# Supplementary material
Source: PubMed Central journal article supplement (PMC7749050)
Supplement: NIHMS1643762-supplement-Supplementary_Information.pdf [file NIHMS1643762-supplement-Supplementary_Information.pdf]

# *Supporting Information for*

## **“Creating Red Light-Switchable Protein Dimerization Systems as Genetically Encoded Actuators with High Specificity”**

### **Table of Contents**

|                                    |           |
|------------------------------------|-----------|
| <b>Supplementary Figures .....</b> | <b>2</b>  |
| <b>Supplementary Tables .....</b>  | <b>16</b> |
| <b>Supplementary Note .....</b>    | <b>33</b> |
| <b>References .....</b>            | <b>36</b> |

## SUPPLEMENTARY FIGURES

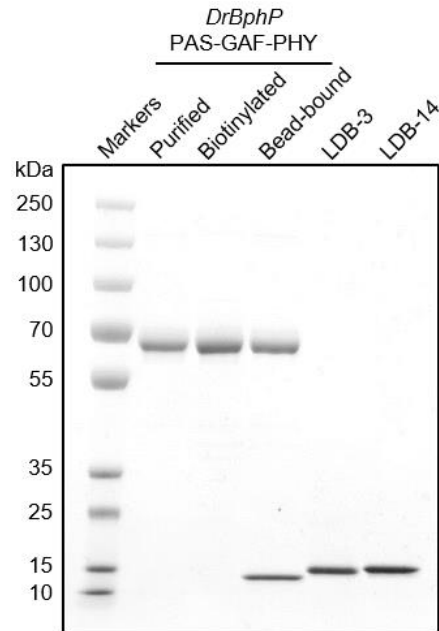

**Figure S1.** SDS-PAGE analysis of purified *DrBphP* and nanobodies. Proteins were purified by nickel affinity and SEC chromatography. To examine *in vitro* biotinylation efficiency by BirA, the biotinylated protein was bound to streptavidin beads (Dynabeads M-280 Streptavidin, Thermo Fisher Scientific) and the bound protein (lane 4) was compared with the input protein (lane 3). The lower band in the lane 4 was streptavidin released from the beads when boiling the sample in an SDS loading buffer.

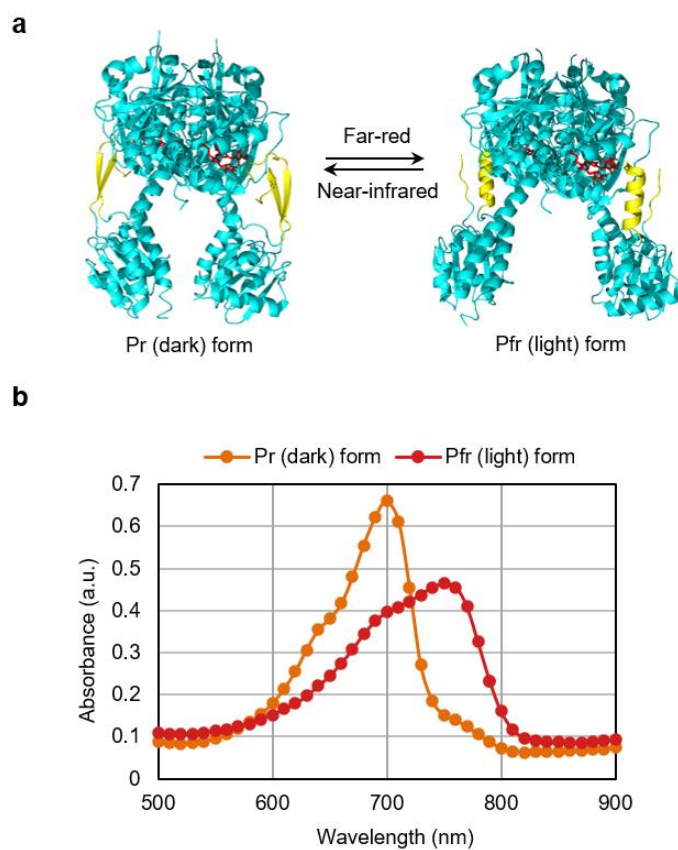

**Figure S2.** Structures and spectra of the dark and light forms of *DrBphP*. (a) Structures of *DrBphP* dark and light forms previously reported<sup>1</sup> showing the biliverdin chromophore (red sticks) bound to a tri-domain photosensory module (cyan cartoon) and conformational changes of a tongue motif (yellow) interacting with the biliverdin binding pocket. (b) Absorption spectra of the dark and light states of the biotinylated *DrBphP* after the 775-nm (0.3 mW/cm<sup>2</sup>, 10 min) and 654-nm (0.5 mW/cm<sup>2</sup>, 2 min) illuminations, respectively.

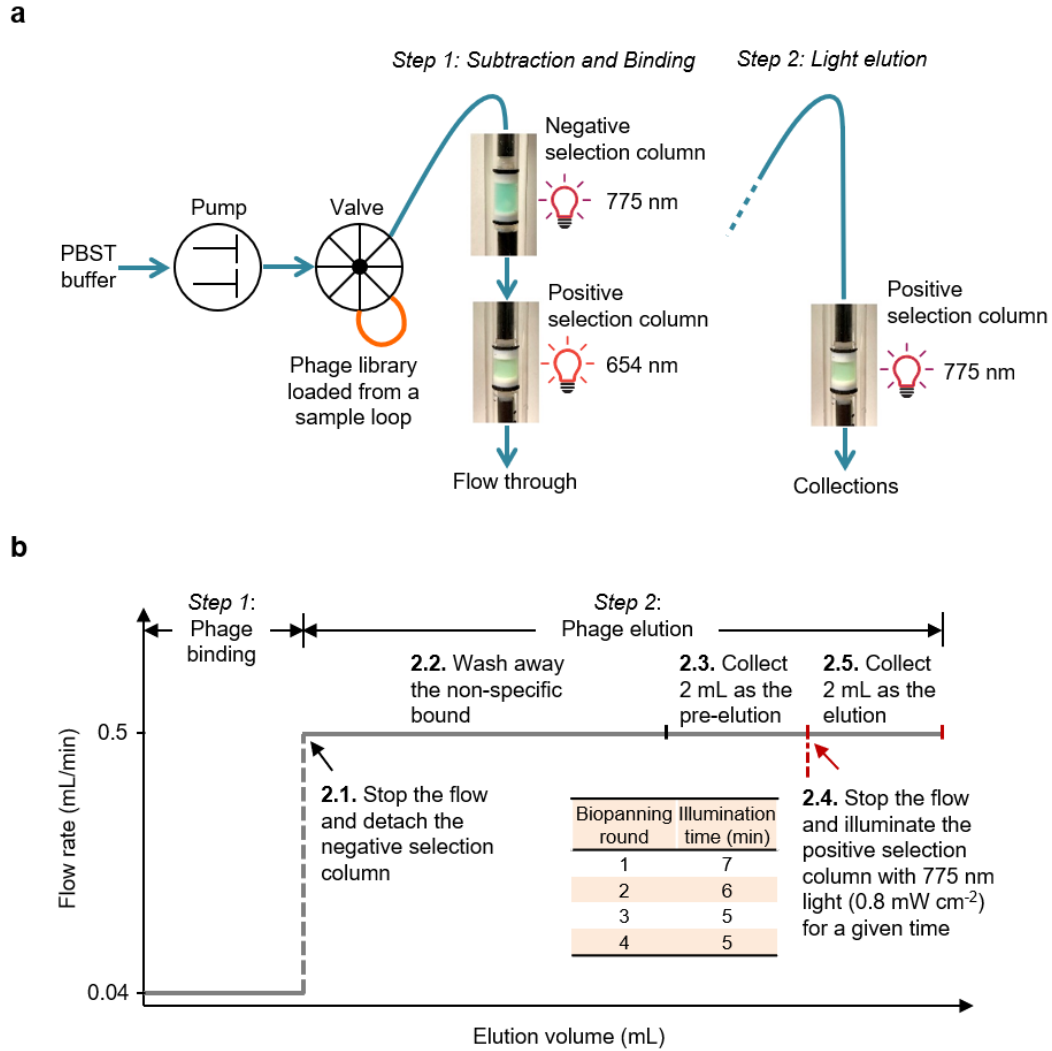

**Figure S3.** Column chromatography-based phage display selection. (a) Two-step biopanning FPLC setup. (b) Flow rate and illumination time setup. In the Step 1, 2 mL phage-displayed nanobodies were loaded to two connected transparent glass columns (HR 5/5, GE Healthcare) packed with 0.4 and 0.2 mL streptavidin agarose resin (Pierce). Before divided into the two columns, the resin was incubated with 1.2 mL 20  $\mu$ M biotinylated *DrBphP* in the dark for 30 min. Next, *DrBphP* in the first (negative selection) and second (positive selection) columns were converted to the dark and light forms by the 775-nm ( $0.3 \text{ mW/cm}^2$ , 10 min) and 654-nm ( $0.5 \text{ mW/cm}^2$ , 2 min) illumination, respectively. After the phage injection, the flow rate was set to be 0.04 mL/min and then decreased to 0 when the UV 280 nm baseline was stable (i.e., non-bound phages were washed out). In the Step 2, the first column was removed, and phages were eluted from the second column by the 775-nm ( $0.8 \text{ mW/cm}^2$ ) illumination for a given time. A pre-elution fraction was collected as a control for the phage count comparison with a light elution fraction to estimate the ratio of phages specifically eluted by the light to those non-specifically eluted (refer to Table S2).

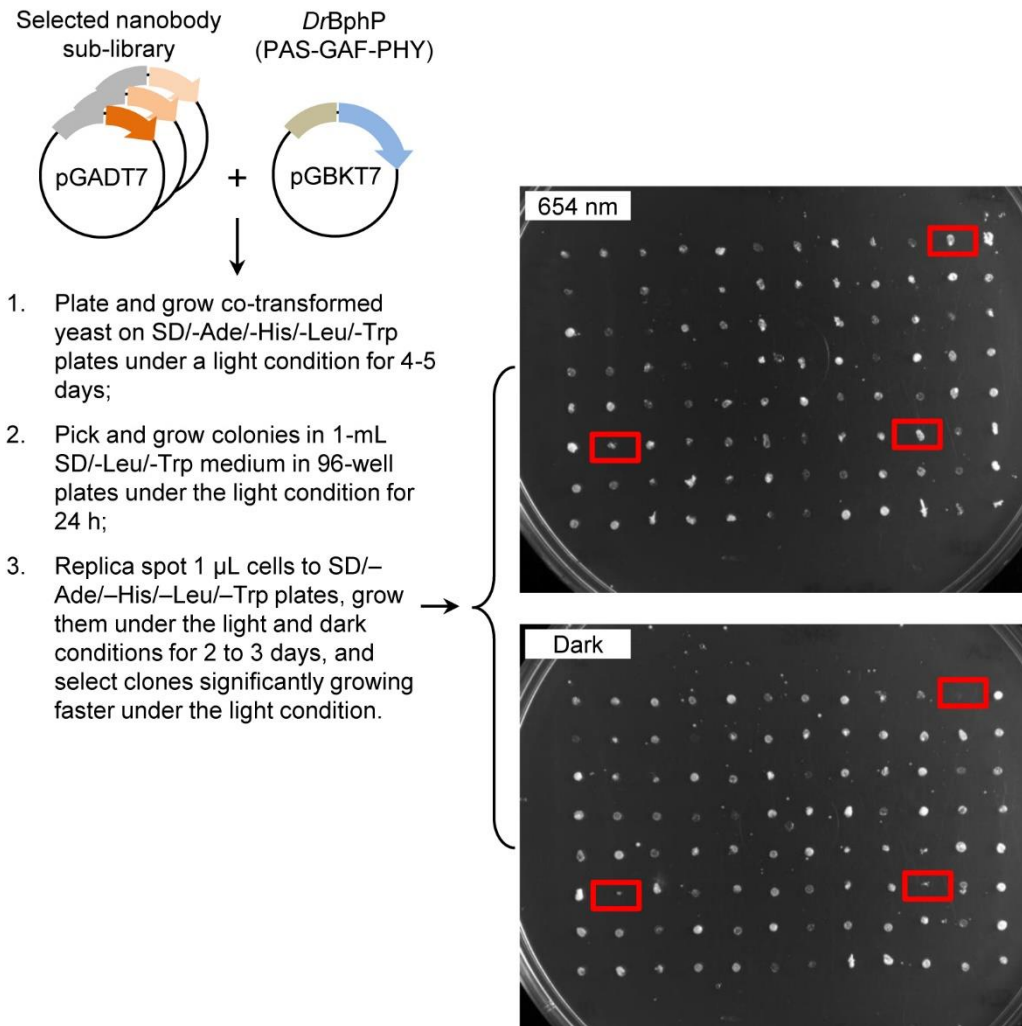

**Figure S4.** Yeast two-hybrid screening. Phage display-enriched nanobodies (orange), as preys, were subcloned to pGADT7 encoding a GAL4 AD domain (grey). *DrBphP* (blue), as a bait, was inserted to pGBKT7 encoding a GAL4 DNA-binding domain (green). The right panel shows a representative result of two replica spotted plates incubated in the dark or under the 654-nm illumination.

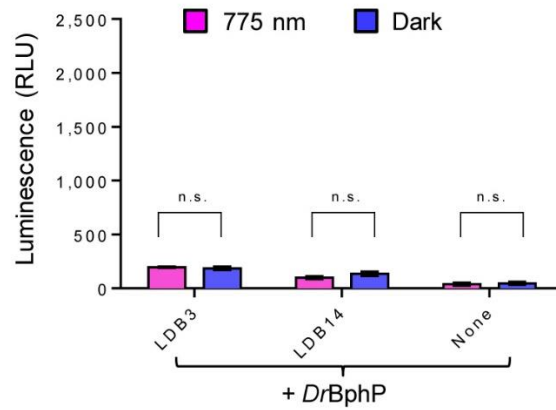

**Figure S5.** Comparison of basal luciferase expression of LDB-3 and LDB-14 LID systems under 775 nm illumination and in the dark. HEK293T cells were transiently co-transfected with the bait, prey and GAL4UAS-luciferase reporter plasmids (~0.25  $\mu\text{g}$  each) in a 0.5 mL culture. Cells were cultured under the 775 nm illumination (0.2  $\text{mW}/\text{cm}^2$ ) or in the dark for 24 hours before measuring luciferase levels. None, the negative control transfected with only the bait and the luciferase reporter plasmids. Data represent mean values of 3 measurements; error bars, the standard error of the mean.

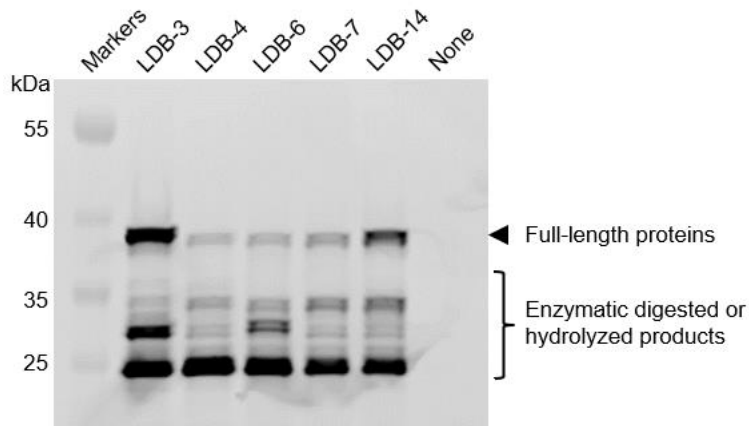

**Figure S6.** In-gel detection of fluorescently labelled nanobodies expressed in HEK293T cells. Cells were transiently transfected with plasmids encoding SNAP-tagged nanobody fusions. Proteins in supernatants of sonication-lysed cells were specifically labeled with SNAP-Surface 649 and analyzed by SDS-PAGE and fluorescence imaging with an Odyssey CLx imaging system. Degraded proteins might also be caused by protein hydrolysis during sample boiling (10 min at 95°C) in the SDS sample loading buffer.

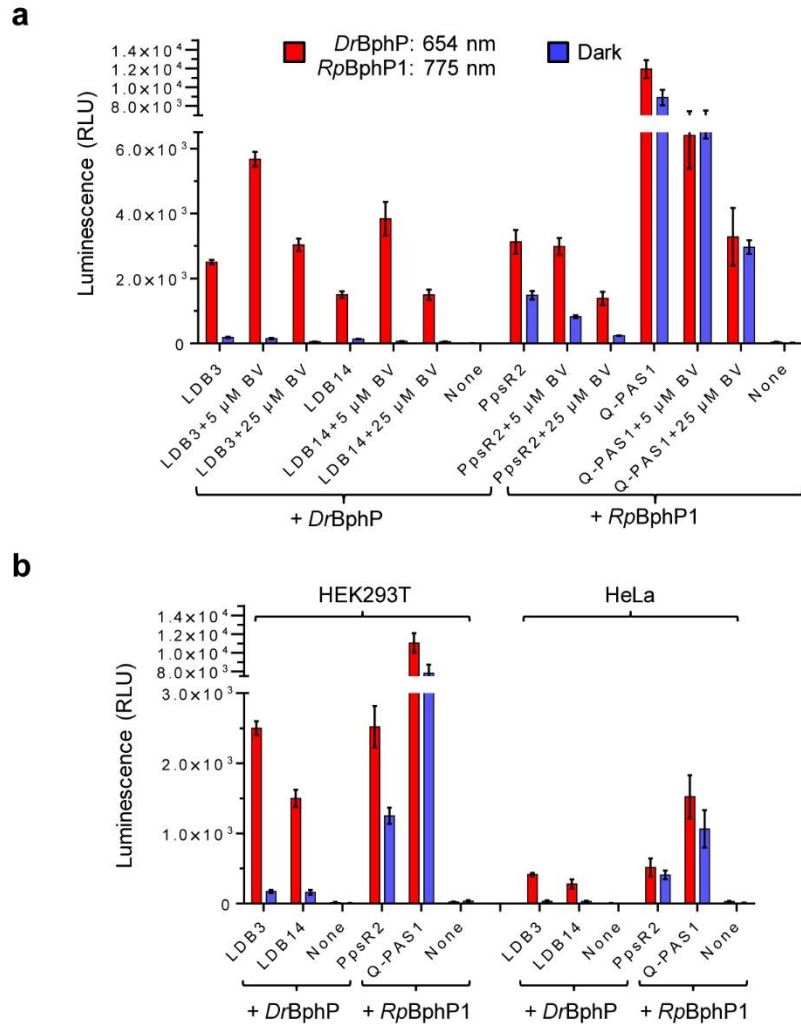

**Figure S7.** Specificity comparison of *DrBphP* (or nanobody) and *RpBphP1*-based LIDs in mammalian cells. The specificity was compared with (a) extra supply of biliverdin and (b) decreased cellular levels of LID proteins. Either HEK293T or HeLa cells were transiently co-transfected with the bait, prey and GAL4UAS-luciferase reporter plasmids (~0.25  $\mu\text{g}$  each) in a 0.5 mL culture. Cells were maintained under the illumination either at 654-nm (0.2 mW/cm<sup>2</sup>) or 775-nm (0.2 mW/cm<sup>2</sup>), or in the dark for 24 hours before measuring luciferase levels. Luminescence intensities of HEK293T and HeLa cells were normalized by cell counts. BV, biliverdin; None, the negative control transfected with only the bait and the luciferase reporter plasmids. Data represent mean values of 3 measurements; error bars, the standard error of the mean.



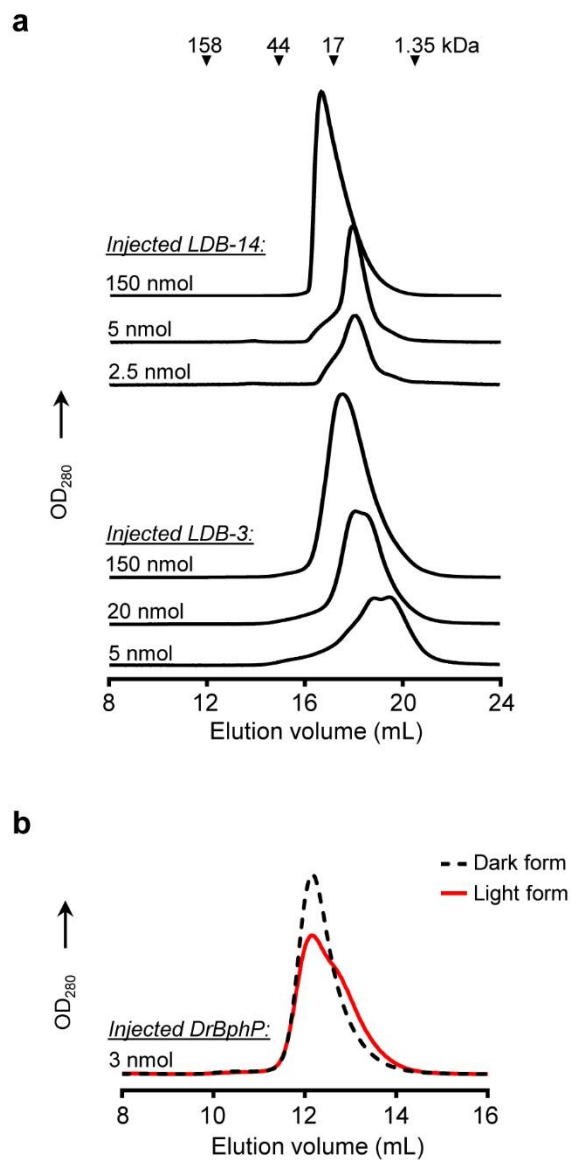

**Figure S8.** Analytical SEC analyses of (a) nanobodies at different concentrations and (b) *DrBphP* in the light and dark forms. Proteins were loaded to a Superdex 200 Increase 10/300 GL column pre-equilibrated with 1× PBS and eluted at a flow rate of 0.75 mL/min at 4°C.

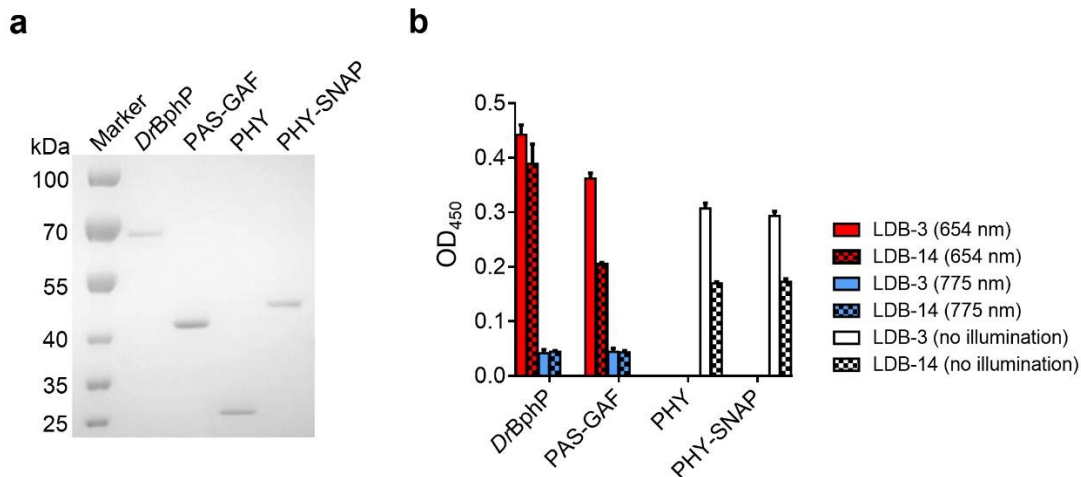

**Figure S9.** Analysis of nanobody binding sites on *DrBphP*. (a) SDS-PAGE analysis of biotinylated, truncated *DrBphP* proteins. The tridomain *DrBphP* (PAS-GAF-PHY), didomain (PAS-GAF), and monodomain (PHY) proteins bearing a C-terminal AviTag and HisTag were *E. coli* expressed, purified and biotinylated as targets for ELISA. Due to relatively low expression solubility, PHY was also prepared as a SNAP tag fusion. (b) Detection of nanobody binding to truncated *DrBphP* proteins by ELISA. Phage-displayed nanobodies were bound to *DrBphP* and PAS-GAF in microtiter plates, which were illuminated with 654-nm ( $0.3 \text{ mW/cm}^2$ ) or 775-nm ( $0.2 \text{ mW/cm}^2$ ) lights during binding and wash steps. PHY and PHY-SNAP were assayed under normal lighting condition. Data represent mean values of 6 measurements; error bars, standard deviation.

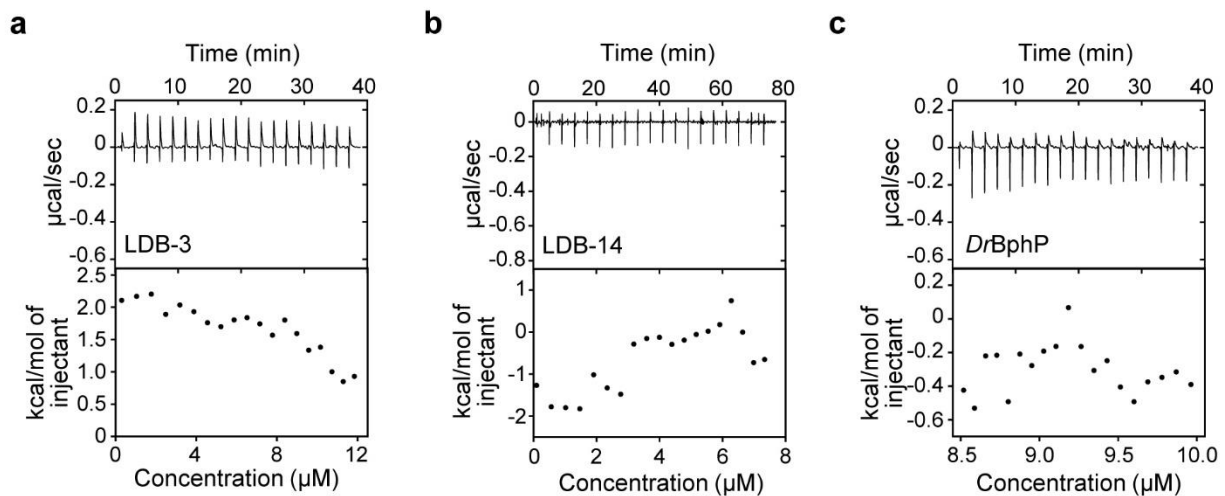

**Figure S10.** ITC analysis of the titration of (a) 80  $\mu\text{M}$  LDB-3 or (b) 50  $\mu\text{M}$  LDB-14 into 1 $\times$  PBS buffer, and (c) the titration of 1 $\times$  PBS buffer into 10  $\mu\text{M}$  *DrBphP*. The raw data (top) and the integration of heats (bottom) for each titration are shown.

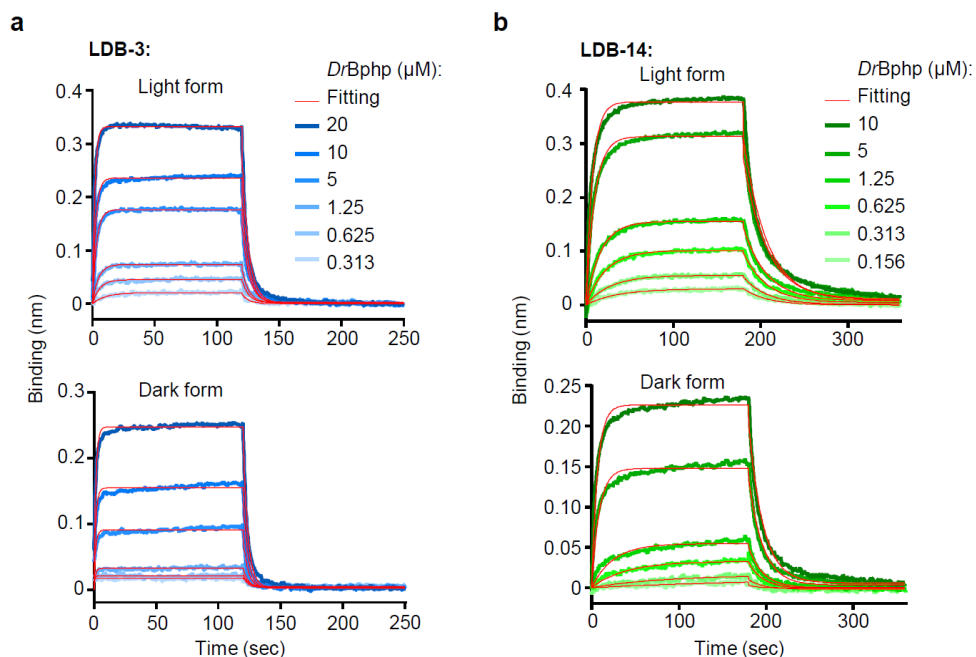

**Figure S11.** BLI analysis of LDB-3 and LDB-14 binding kinetics. BLI sensorgrams show *DrBphP* binding to LDB-3 (a) and LDB-14 (b). Nanobodies were immobilized on Streptavidin biosensors and interacted with *DrBphP* after the 654-nm (light form) or 775-nm (dark form) illumination. Data were fitted using a global 1:1 model. *Note:* the dark-form *DrBphP* was likely converted to the light form by the white light applied to BLI biosensors.

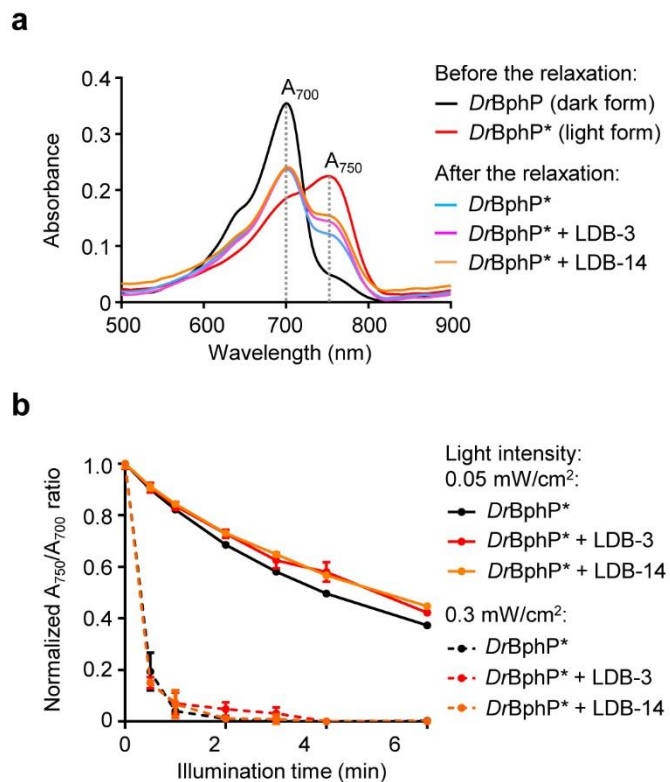

**Figure S12.** Inhibition of *DrBphP* photoconversion to the dark form by the nanobody binding. (a) Representative absorption spectra of the photoconverted light and dark forms and after photoconversion by 775-nm illumination with or without LDB-3 or LDB-14 binding. (b) Time-course analysis of photoconversion rates of unbound and nanobody-bound light-form *DrBphP* by the 775-nm illumination. 400  $\mu$ l 5  $\mu$ M (final concentration) light-form *DrBphP* (after the 654-nm illumination at 0.5 mW/cm<sup>2</sup> for 2 min) was incubated with 5  $\mu$ M (final concentration) LDB-3 or LDB-14 for 10 min before the photoconversion.

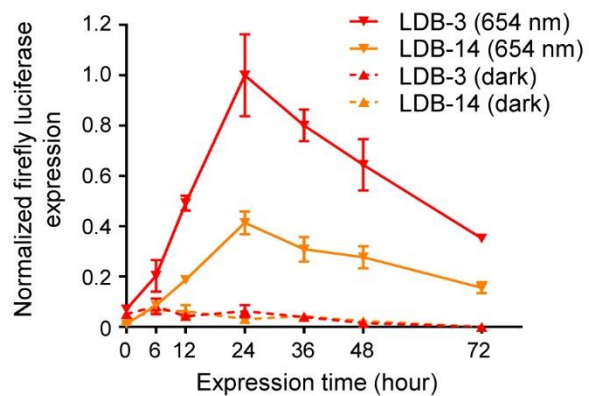

**Figure S13.** Time-course analysis of red light-induced luciferase expression. HEK293T cells were co-transfected with the bait, prey, and GAL4UAS-luciferase reporter plasmids (~0.25  $\mu\text{g}$  each) in a 0.5 mL culture. Transfected cells were incubated under the 654-nm ( $0.2 \text{ mW}/\text{cm}^2$ ) illumination or in the dark. Data represent mean values of 3 measurements; error bars, standard deviation.

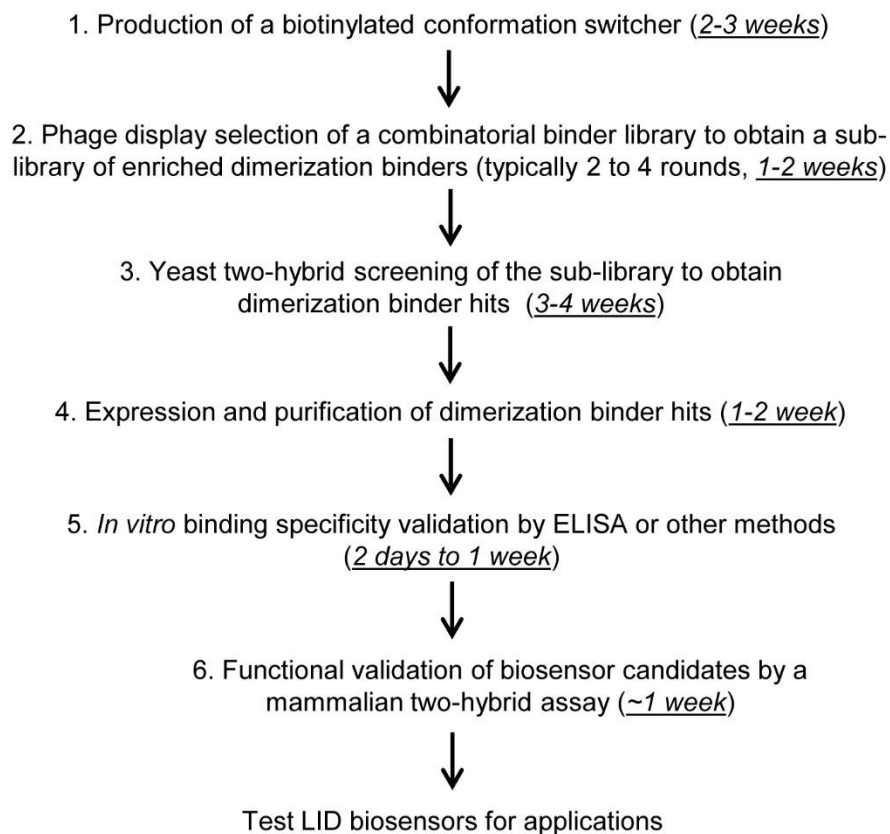

**Figure S14.** Flowchart and timeline of COMBINES-LID.

## SUPPLEMENTARY TABLES

**Table S1.** Summary of photoswitchable proteins or domains that can potentially be used as conformational switchers in LID systems.

| Photo-switchable proteins (or domains)                | Example(s)   | Chromophore(s)           | Excitation $\lambda$ (nm) | Reversion $\lambda$ (nm) | Oligomeric state |            | Natural light induced binder(s) | Reference (s) |
|-------------------------------------------------------|--------------|--------------------------|---------------------------|--------------------------|------------------|------------|---------------------------------|---------------|
|                                                       |              |                          |                           |                          | Dark form        | Light form |                                 |               |
| <b>UV receptors</b>                                   | UVR8         | Trp                      | ~300                      | Dark                     | Dimer            | Monomer    | COP1                            | 2-4           |
| <b>Cyanobacterioc hromes</b>                          | CcaS         | PCB                      | ~535                      | ~672/dark                | Monomer          | Monomer    | CcaR                            | 5-6           |
|                                                       | cPAC         | PCB                      | ~410                      | ~520/dark                | Dimer            | Dimer      | Unknown                         | 7             |
|                                                       | UirS         | PCB                      | ~400                      | ~530/dark                | Monomer          | Monomer    | UirR                            | 8-9           |
| <b>Sensors of blue-light using FAD (BLUF) domains</b> | PixD         | FAD or FMN               | ~450                      | Dark                     | Decamer          | Dimer      | PixE                            | 10-12         |
|                                                       | bPAC         | FAD or FMN               | ~450                      | Dark                     | Dimer            | Dimer      | Unknown                         | 13-15         |
| <b>LOV domains</b>                                    | AsLOV2       | FMN                      | ~450                      | Dark                     | Monomer          | Monomer    | Unknown                         | 16-18         |
|                                                       | YtvA         | FAD, FMN, or riboflavin  | ~450                      | Dark                     | Dimer            | Dimer      | Unknown                         | 19-21         |
|                                                       | VVD          | FAD or FMN               | ~450                      | Dark                     | Monomer          | Dimer      | VVD                             | 22-24         |
|                                                       | FKF1         | FMN                      | ~450                      | Dark                     | Monomer          | Dimer      | GI                              | 25-27         |
|                                                       | EL222        | FMN                      | ~450                      | Dark                     | Monomer          | Dimer      | Unknown                         | 28-29         |
| <b>Cryptochromes</b>                                  | CRY2         | FAD                      | ~450                      | Dark                     | Monomer          | Monomer    | CIB1                            | 30-31         |
| <b>Fluorescent protein domains</b>                    | Dronpa145K/N | p-HBI                    | ~400                      | ~500/dark                | Monomer          | Dimer      | Unknown                         | 32-33         |
|                                                       | PYP          | p-coumaric acid          | ~450                      | Dark                     | Monomer          | Monomer    | Unknown                         | 34-35         |
| <b>Opsins</b>                                         | BeCyclOp     | Retinal                  | ~530                      | Dark                     | Dimer            | Dimer      | Unknown                         | 36            |
| <b>Cobalamin binding domains (CBDs)</b>               | TtCBD        | AdoCbl, MetCbl, or CNCbl | ~545                      | Dark                     | Tetramer         | Monomer    | Unknown                         | 37            |
|                                                       | MxCBD        | AdoCbl, MetCbl, or CNCbl | ~545                      | Dark                     | Tetramer         | Monomer    | Unknown                         | 37            |
| <b>Phytochromes</b>                                   | RpBphP1      | BV                       | ~740                      | ~636/dark                | Dimer            | Dimer      | PpsR2                           | 38-39         |
|                                                       | DrBphP       | BV                       | ~655                      | ~780/dark                | Dimer            | Dimer      | Unknown                         | 1, 40-41      |
|                                                       | Cph1         | PCB or P $\Phi$ B        | ~657                      | ~731/dark                | Dimer            | Dimer      | Unknown                         | 42-44         |
|                                                       | PhyB         | PCB                      | ~660                      | ~740/dark                | Monomer          | Monomer    | PIF3/PIF6                       | 45-47         |



**Table S2.** Enrichment of phage titers following each round of biopanning for the dimerization binder selection.

| Round | Input count             | Pre-elution count*     | 775 nm light elution count** |
|-------|-------------------------|------------------------|------------------------------|
| 1     | $\sim 1 \times 10^{14}$ | $\sim 5.4 \times 10^6$ | $\sim 2.0 \times 10^6$       |
| 2     | $\sim 1 \times 10^{13}$ | $\sim 1.2 \times 10^5$ | $\sim 2.3 \times 10^5$       |
| 3     | $\sim 1 \times 10^{13}$ | $\sim 1.8 \times 10^5$ | $\sim 7.3 \times 10^5$       |
| 4     | $\sim 1 \times 10^{13}$ | $\sim 1.5 \times 10^7$ | $\sim 1.4 \times 10^8$       |

**Note:** After phage binding, the positive selection column was washed with  $\sim 30$  mL 0.05% PBST buffer. 2 mL pre-elution fraction (\*) was collected at 0.5 mL/min immediately before the 775 nm-illumination at 0 mL/min. 2 mL elution fraction (\*\*) was collected at 0.5 mL/min immediately after the illumination. Phage titers of the collected fractions were measured to determine the enrichment of clones specifically eluted by the light for each selection round.

**Table S3.** CDR sequences of light-induced dimerization binders (LDBs) characterized in the work.

| <b>Nanobody</b> | <b>CDR1</b> | <b>CDR2</b> | <b>CDR3</b>        |
|-----------------|-------------|-------------|--------------------|
| <b>LDB-3</b>    | FTWDHYI     | ENGDAWN     | IGFDVPSGRSWQGSHFWM |
| <b>LDB-4</b>    | DTSYLYS     | WWWNLQ      | WSIYFPPGNDYNGYH    |
| <b>LDB-6</b>    | FFSNWSD     | FWADGTE     | WYGPVNGFYMFD       |
| <b>LDB-7</b>    | STSDFES     | SWFTNPP     | HRSIWYHPT          |
| <b>LDB-14</b>   | TTSRWES     | WQNNSVP     | AQHNFLGHR          |

**Table S4.** ITC-derived thermodynamic parameters for LDB-3 and LDB-14 binding to the *Dr*BphP light form.

|               | <b>n (stoichiometry)</b> | <b><math>K_D^{\text{app}}</math> (<math>\mu\text{M}</math>)</b> | <b><math>\Delta\text{H}</math> (kJ/mol)</b> | <b><math>\Delta\text{G}</math> (kJ/mol)</b> | <b><math>-\text{T}\Delta\text{S}</math> (kJ/mol)</b> |
|---------------|--------------------------|-----------------------------------------------------------------|---------------------------------------------|---------------------------------------------|------------------------------------------------------|
| <b>LDB-3</b>  | 0.605                    | 1.01                                                            | -37.0                                       | -34.2                                       | 2.78                                                 |
| <b>LDB-14</b> | 0.556                    | 0.47                                                            | -112.8                                      | -36.1                                       | 76.7                                                 |

*Note:* The binding of the nanobodies to the dark form was too weak to be determined by ITC (Figure 5).

**Table S5.** Kinetic parameters of selected dimerization binders binding to the light form by Bio-layer interferometry.

|               | <b>Molar ratio</b> | <b><math>K_D^{\text{app}}</math> (<math>10^{-6}\text{M}</math>)</b> | <b><math>k_{\text{on}}^{\text{app}}</math> (<math>10^4 \text{ M}^{-1} \text{ s}^{-1}</math>)</b> | <b><math>k_{\text{off}}^{\text{app}}</math> (<math>10^{-2} \text{ s}^{-1}</math>)</b> |
|---------------|--------------------|---------------------------------------------------------------------|--------------------------------------------------------------------------------------------------|---------------------------------------------------------------------------------------|
| <b>LDB-3</b>  | 1:1                | 7.7                                                                 | 2.4                                                                                              | 18.5                                                                                  |
| <b>LDB-14</b> | 1:1                | 2.4                                                                 | 1.56                                                                                             | 3.74                                                                                  |

*Note:* Although the nanobody binding to the dark form was detectable (Figure S11), the binding data are not reliable because the white light applied to BLI biosensors can convert *DrBphP* to the light form.

**Table S6.** Synthetic oligos used for plasmid construction in this study.

|                          | Vector backbone | Name                       | Sequences (5' to 3')                                                     | Note                                                  |
|--------------------------|-----------------|----------------------------|--------------------------------------------------------------------------|-------------------------------------------------------|
| <i>DrBphP</i> -Avi-His   | pBAD            | <i>DrBphP</i> -Avi-His F   | CTTTAAGAAGGAGATAT <u>GGATCC</u> CATGAGTCGTGAC<br>CCTTTGCCAT              | <i>Bam</i> HI or <i>Eco</i> RI sites are underlined.  |
|                          |                 | <i>DrBphP</i> -Avi-His R   | TGGTGATGGTGATGATGGAATTCCTAGTGATGGTG<br>GTGATGATG                         |                                                       |
| <i>DrBphP</i> -His       | pBAD            | <i>DrBphP</i> -His F       | CTTTAAGAAGGAGATAT <u>GGATCC</u> CATGAGTCGTGAC<br>CCTTTGCCA               | <i>Bam</i> HI or <i>Eco</i> RI sites are underlined.  |
|                          |                 | <i>DrBphP</i> -His R       | TGGTGATGGTGATGATGGAATTCCTAATGCGCCAGT<br>AAGAGTGTC                        |                                                       |
| Nanobody-His             | pADL-23c        | Nanobody-His F             | GGATTGTTATTACTCGCG <u>GCCAGCCGGCC</u> ATGGC<br>AGAAGTTCAGCTGCAGGCAAGCGG  | <i>Bgl</i> II sites are underlined.                   |
|                          |                 | Nanobody-His R             | TGATGGTGATGGTGTTGGCTCCCGGGCTGCT<br>GCTAACGGTAACCTGGGTGC                  |                                                       |
| Nanobody-Avi-His         | pADL-23c        | Nanobody-Avi-His F         | TATTACTCGCG <u>GCCAGCCGGCC</u> ATGGCAGAAGTT<br>CAGCTGCAGGCAAGC           | <i>Bgl</i> II sites are underlined.                   |
|                          |                 | Nanobody-Avi-His R         | GGTGGATAAGCTTGGCTCCCGGGCTGCTGCTAA<br>CGGTAACCTGGGTGC                     |                                                       |
| <i>DrBphP</i> -Yeast     | pGBKT7          | <i>DrBphP</i> -Yeast F     | GAGGAGGACCTG <u>CATATGGGAGGCGGTCCGGTGG</u><br>CGG                        | <i>Nde</i> I or <i>Bam</i> HI sites are underlined.   |
|                          |                 | <i>DrBphP</i> -Yeast R     | CTGCAGGTCGAC <u>GGATCC</u> TAGCTGCTAACGGTAA<br>CCTGGG                    |                                                       |
| Nanobody-Yeast           | pGADT7          | Nanobody-Yeast F           | GATTACGCTC <u>CATATGGGAGGCGGTCCGGTGGCGG</u><br>TTCTGAAGTTCAGCTGCAGGCAAGC | <i>Nde</i> I or <i>Bam</i> HI sites are underlined.   |
|                          |                 | Nanobody-Yeast R           | CTCGAGCTCGAT <u>GGATCC</u> TAGCTGCTAACGGTAA<br>CCTGGGT                   |                                                       |
| <i>DrBphP</i> -Mammalian | pBobi           | <i>DrBphP</i> -Mammalian F | GTTGCCACCATG <u>GGATCC</u> CATGAAGCTACTGTCTTC<br>TATC                    | <i>Bam</i> HI or <i>Xho</i> I sites are underlined.   |
|                          |                 | <i>DrBphP</i> -Mammalian R | GGAACCACCACC <u>CTCGAGT</u> AATGCGCCAGTAAGAG<br>TGTC                     |                                                       |
| Nanobody-Mammalian       | pBobi           | 3*NLS F                    | GTTGCCACCATG <u>GGATCC</u> CCCAAGAAGAAGCGCAA<br>GGT                      | <i>Bam</i> HI or <i>Xho</i> I sites are underlined.   |
|                          |                 | 3*NLS R                    | TGCCTGCAGCTGAACCTCTCCGCTGCCACCAGACC<br>CTC                               |                                                       |
|                          |                 | Nanobody F                 | GAAGTTCAGCTGCAGGCAAGC                                                    |                                                       |
|                          |                 | Nanobody R                 | ACTGCCACCGCCCGCTGCTGCTAACGGTAACCT<br>GGGT                                |                                                       |
|                          |                 | p65 F                      | AGCGGCGGCGGTGGCAGTCAGTACCTGCCAGATAC<br>AGAC                              |                                                       |
|                          |                 | p65 R                      | GGAACCACCACC <u>CTCGAGG</u> GAGCTGATCTGACTCA<br>GCAG                     |                                                       |
| LDB-14-Mammalian         | pcDNA3          | 3*NLS F                    | AAGCTGGCTAGTTA <u>AGCTT</u> ATGCCCAAGAAGAAGC<br>GCAAGGTG                 | <i>Hind</i> III or <i>Xho</i> I sites are underlined. |
|                          |                 | 3*NLS R                    | TCCGCTGCCACCAGACCCTC                                                     |                                                       |
|                          |                 | Nanobody F                 | GTTGAAGCATCTGGATCCGGAGGCGGTCCGGTGG<br>CGG                                |                                                       |
|                          |                 | Nanobody R                 | GCCACTTCCTCCGGTACCGCTGCTAACGGTAACCT<br>GGGT                              |                                                       |

|                               |        |                              |                                                                                            |                                                                                                                                            |
|-------------------------------|--------|------------------------------|--------------------------------------------------------------------------------------------|--------------------------------------------------------------------------------------------------------------------------------------------|
|                               |        | p65 F                        | GGGTCTGGTGGCAGCGGACAGTACCTGCCAGATAC<br>AGACGAT                                             |                                                                                                                                            |
|                               |        | p65 R1 (first round<br>PCR)  | TCCACTGCCGCCAGAGCTGCCACTTCTCCGGAGC<br>TGATCTGACTCAGCAG                                     |                                                                                                                                            |
|                               |        | p65 R2 (second<br>round PCR) | CGGGCCCTCTAGACTCGAGCTACTGAATTCTCCAC<br>TGCCGCCAGAGCTGC                                     |                                                                                                                                            |
| <i>RpBphP1</i> -<br>Mammalian | pcDNA3 | GAL4 BD F                    | ACCCAAGCTGGCTAGTTA <u>AAGCTT</u> ATGAAGCTACTG<br>TCTTCTATCG                                | <i>HindIII</i> or <i>XhoI</i><br>sites are<br>underlined.                                                                                  |
|                               |        | GAL4 BD R                    | CATATGCAGGTCCTCCTCTGA                                                                      |                                                                                                                                            |
|                               |        | <i>RpBphP1</i> -F            | GAGGAGGACCTGCATATGGTGGCAGGTCATGCCTC<br>TGCC                                                |                                                                                                                                            |
|                               |        | <i>RpBphP1</i> -R            | GGGCCCTCTAGACTCGAGCTACTTCTTGTCTGCG<br>AGCCATT                                              |                                                                                                                                            |
| PpsR2-<br>Mammalian           | pcDNA3 | PpsR2 F                      | GTTGAAGCATCTGGATCCGTGGCGTCAAAGTCCGT<br>TCAT                                                | <i>BamHI</i> or <i>KpnI</i><br>sites are<br>underlined.                                                                                    |
|                               |        | PpsR2 R                      | GCCACTTCTCCGGTACCATCCTCTGCGTCTGCTG<br>AG                                                   |                                                                                                                                            |
| Q-PAS1-<br>Mammalian          | pcDNA3 | Q-PAS1 F                     | GTTGAAGCATCTGGATCCGGCAAGAACATGCAGGC<br>GGT                                                 | <i>BamHI</i> or <i>KpnI</i><br>sites are<br>underlined.                                                                                    |
|                               |        | Q-PAS1 R                     | GCCACTTCTCCGGTACCCTGTCGATCGCGGGAG<br>TCG                                                   |                                                                                                                                            |
| Nanobody-<br>SNAP             | pBobi  | Nanobody F                   | ACTGAGCTCCTTAAGTTGCCACCATGGGATCCGA<br>AGTTCAGCTGCAGGCAAGC                                  | <i>BamHI</i> or <i>XhoI</i><br>sites are<br>underlined.                                                                                    |
|                               |        | Nanobody R                   | ACTGCCACCGCCCGCTTAACGCTGCTAACGGTAA<br>CCTGGGT                                              |                                                                                                                                            |
|                               |        | SNAP F                       | AACGGGGCGGTGGCAGTGACAAAGACTGCGAAAT<br>GAAGCG                                               |                                                                                                                                            |
|                               |        | SNAP R                       | TCAGCTTCTGCTCACCGGAACCACCACCCTCGAGA<br>CCCAGCCAGGCTTGCCCA                                  |                                                                                                                                            |
| PAS-GAF-Avi-<br>His           | pBAD   | PAS-GAF-Avi-His<br>F         | AAGCTTGGTGGCGGTAGC                                                                         | Constructed by<br>Q5 Site-<br>Directed<br>Mutagenesis<br>Kit (New<br>England<br>Biolabs,<br>E0554S) based<br>on <i>DrBphP</i> -Avi-<br>His |
|                               |        | PAS-GAF-Avi-His<br>R         | TTCCTTGACTTGCACCTGAAG                                                                      |                                                                                                                                            |
| PHY-Avi-His                   | pBAD   | PHY-Avi-His F                | GCCGCGGACGTTGCTGCA                                                                         |                                                                                                                                            |
|                               |        | PHY-Avi-His R                | CATGGATCCATATCTCCTTCTTAAAGTTAAACAAA<br>AGGGG                                               |                                                                                                                                            |
| PHY-SNAP-<br>Avi-His          | pLGSA  | PHY-SNAP-Avi-His<br>F        | ACTTTAAGAAGGAGATATACATATGGCCGCGGACG<br>TTGCTGCATTCC                                        |                                                                                                                                            |
|                               |        | PHY-SNAP-Avi-His<br>R        | TCATTTGCGAGTCTTTGTCCGATCCTAATGCGCCA<br>GTAAGAGTGTCTG                                       |                                                                                                                                            |
| <i>DrBphP</i> -<br>AcGFP-CAAX | pBobi  | <i>DrBphP</i> F              | GTTGCCACCATGGGATCCATGAGTCGTGACCCTTT<br>GCCAT                                               | <i>BamHI</i> or <i>XhoI</i><br>sites are<br>underlined.                                                                                    |
|                               |        | <i>DrBphP</i> R              | CCGCCACCACCGCTCGAGCCAACTAATGCGCCAGT<br>AAGAGTGTCTG                                         |                                                                                                                                            |
|                               |        | AcGFP-CAAX F                 | GGCTCGAGCGGTGGTGGCGGAGCGGAGGTATGGT<br>GAGCAAGGGCGCCGA                                      |                                                                                                                                            |
|                               |        | AcGFP-CAAX R                 | GGAACCACCACCCTCGAGTCACATAATGACACACT<br>TGGTTTGTCTTTCTTCTTTTCTTCTTCTTGTAC<br>AGCTCATCCATGCC |                                                                                                                                            |
| LDB-3-mCherry                 | pBobi  | LDB-3 F                      | GTTGCCACCATGGGATCCGAAGTTCAGCTGCAGGC<br>AAGC                                                |                                                                                                                                            |

|  |  |           |                                                          |                                                     |
|--|--|-----------|----------------------------------------------------------|-----------------------------------------------------|
|  |  | LDB-3 R   | CCGCCACCACCGCTCGAGCCAACGCTGCTAACGGT<br>AACCTGGGT         | <i>Bam</i> HI or <i>Xho</i> I sites are underlined. |
|  |  | mCherry F | GGCTCGAGCGGTGGTGGCGGGAGCGGAGGTATGGT<br>GAGCAAGGGCGAGGAG  |                                                     |
|  |  | mCherry R | GGAACCACCACC <u>CTCGAGT</u> CAGTTTCCGGA CTGT<br>ACAGCTCG |                                                     |

**Table S7.** Protein coding sequences (CDSs) and noncommercial vector used in this work.

| Purpose                   | Name                              | CDS or vector sequence                                                                                                                                                                                                                                                                                                                                                                                                                                                                                                                                                                                                                                                                                                                                                                                                                                                                                                                                                                                                                                                                                                                                                                                                                                                                                                                                                                                                                                                                                                                                                                                                                                                                                                                                                                                    | Subcloning note                                                                                                                                           |
|---------------------------|-----------------------------------|-----------------------------------------------------------------------------------------------------------------------------------------------------------------------------------------------------------------------------------------------------------------------------------------------------------------------------------------------------------------------------------------------------------------------------------------------------------------------------------------------------------------------------------------------------------------------------------------------------------------------------------------------------------------------------------------------------------------------------------------------------------------------------------------------------------------------------------------------------------------------------------------------------------------------------------------------------------------------------------------------------------------------------------------------------------------------------------------------------------------------------------------------------------------------------------------------------------------------------------------------------------------------------------------------------------------------------------------------------------------------------------------------------------------------------------------------------------------------------------------------------------------------------------------------------------------------------------------------------------------------------------------------------------------------------------------------------------------------------------------------------------------------------------------------------------|-----------------------------------------------------------------------------------------------------------------------------------------------------------|
| <i>E. coli</i> expression | <i>DrBphP</i><br>- <i>Avi-His</i> | ATGAGTCGTGACCCTTTGCCATTCTTTCTCCTCTTTATCTGGGTGGACCCGAGAT<br>TACAACAGAAAACCTGCGAACGCGAACCAATTACATCCCGGATCTATTCAACCAC<br>ACGGTGCATTGCTGACGGCAGACGGACATTCCGGAGAGGTTTACAGATGTCGCTT<br>AACGCAGCAACGTTTCTGGGACAAGAGCCTACGGTTTTCGCGGGCCAGACGTTAGC<br>GGCTCTGTTGCCAGAGCAATGGCCGGCCTTACAGGCGGCATTGCCTCCAGGGTGCC<br>CCGATGCATTGCAATACCGCGGACACTGGATTGGCCGGCGGACAGGACATCTTCT<br>CTGACAGTCCACCGCGTGGGCGAGCTGTTGATCCTGGAGTTTGAACCTACGGAGGC<br>CTGGGACTCGACTGGCCCGCACGCGTTACGCAATGCGATGTTTCGCTCTTGAATCAG<br>CGCCAAACTTGCAGCGGTTAGCTGAAGTGGCCACAAAACCGTACCGGAGCTTACA<br>GGCTTTGACCGCGTGATGTTATACAAATTCGCACCCGATGCGACAGGCGAGGTAAT<br>CGCCGAAGCCCGCGGAGGGGTTGCATGCCTTTTCTGGCCATCGTTTCCGGCCT<br>CAGATATTCCCGCCCAAGCGCGGCCCTTTACTCTGCCATCTGCTTCGTTTACT<br>GCGGACACGCGCGCGGGCGGCTTCCCTTAGACCCAGTACTTAATCCTCAGACTAA<br>CGCTCCTACCCCTTAGGGGGGGCAGTGTGCGTGCAGCTCGCCTATGCACATGC<br>AGTACCTTCGCAATATGGGCGTCGGCTCCTCTTAAAGTGTATCAGTGGTAGTTGGG<br>GGGACAGTTATGGGCTGATTGCGTGCCATCATCAGACCCCTATGTTTTGCCACC<br>AGACCTTCGTACTACTCTTGAATACTGGGGCGTTTATTAAGCCTTCAGGTGCAAG<br>TCAAGGAAGCCCGGACGTTGCTGCATTCCGTCAGTCACTTCGCGAACACCATGCG<br>CGCGTCGCCTTAGCCGCGAGCGCATTCCCTGTCGCGCCACGATACTCTTCCGACCC<br>TGCACCTGATCTTCTGGGCTGATGCGTGTGGGGCTTAATCCTGCGTTTTGAAG<br>GTCGTTGGCAGACGTTAGGAGAAGTCCCGCCCGCTCCCGCAGTCGATGCAGTGT<br>GCATGGCTTGAACCCAACAGGGGCGCTTGTTCAGACTGATGCATTGGGGCAGTT<br>GTGGCCGGCGGGGCTGATTTGGCTCCCTCAGCCGGGCTGCTTGCATTTAG<br>TAGGGGAGGGATGGAGTGAGTGTGTTGGTTACGTCCCAGACTGCGCCTTGAG<br>GTTGCGTGGGGTGGAGCAACTCCAGACCAGGCCAAGGACGACCTGGGCCCTCGTCA<br>CAGTTTCGATACTTACTTAGAAGAGAAGCGTGGGTATGCAGAACCCTGGCATCCCG<br>GAGAGATTGAGGAAGCTCAGGATTTGCGCGACACTCTTACTGGCGCATTAAAGCTT<br>GGTGGCGGTAGCGAGAATTTGATTTTTAGGGTGGCGGTGGCAGTAGCTTATCCAC<br>CCCGCCGACCCGAGCACTCCTCCTACCGGTTCTGAACGACATCTTCGAGGCTCAGA<br>AAATCGAATGGCAGCAATCATCACCACCATCAC | The CDS was inserted into pBAD (Addgene #80341) using <i>Bam</i> HI/ <i>Eco</i> RI restriction sites.                                                     |
|                           | <i>DrBphP</i><br>- <i>His</i>     | ( <i>DrBphP</i> ) -GAATTCATCATCACCATCACCAT                                                                                                                                                                                                                                                                                                                                                                                                                                                                                                                                                                                                                                                                                                                                                                                                                                                                                                                                                                                                                                                                                                                                                                                                                                                                                                                                                                                                                                                                                                                                                                                                                                                                                                                                                                | The sequence of <i>DrBphP</i> is the same as above. The CDS was inserted into pBAD (Addgene #80341) using <i>Bam</i> HI/ <i>Eco</i> RI restriction sites. |
|                           | LDB-3-<br><i>His</i>              | GAAGTTCAGCTGCAGGCAAGCGGTGGTGGTTTTGTTTACGCTGGTGGTAGCCTGCG<br>TCTGAGCTGTGCAGCCAGCGGTTTTACCTGGGATCATACATCATGGGCTGGTTTT<br>GCCAGGCACCGGTAAGAAGCTGAATTTGTTAGCGCAATCAGCGAAAATGGTGAT<br>GCATGGAATTTATGCCGATAGCGTGAAAGTTCGCTTTACCATTAGCCGTGATAA<br>TAGCAAAAATACCGTTTACCTGCAGATGAATAGTCTGCGTGCAGAAGATACCGCAA<br>CCTATTATTGTGCAATCGGTTTTGATGTTCCATCTGGTCTTCTTGGCAGGTTCT<br>CATTTTTGGATGTATTGGGGTCAGGGCACCAGGTTACCCTTAGCAGCAGCCCGG<br>AGGCCAACACCATCACCACCATCAT                                                                                                                                                                                                                                                                                                                                                                                                                                                                                                                                                                                                                                                                                                                                                                                                                                                                                                                                                                                                                                                                                                                                                                                                                                                                                                                                                      | The CDS was inserted into pADL-23c (Antibody Design Labs) using a <i>Bgl</i> II restriction site.                                                         |
|                           | LDB-3-<br><i>Avi-His</i>          | (LDB-3) -<br>AGCCCGGAGGCCAAAGCTTATCCACCCCGAGTGTAGATCTCGGTGGTTCGCGTAT<br>CATTGGTCTGAACGACATCTTCGAGGCTCAGAAAATCGAATGGCAGCAACATCATC<br>ACCACCATCACTCT                                                                                                                                                                                                                                                                                                                                                                                                                                                                                                                                                                                                                                                                                                                                                                                                                                                                                                                                                                                                                                                                                                                                                                                                                                                                                                                                                                                                                                                                                                                                                                                                                                                        | The sequence of LDB-3 is the same as above. The CDS was inserted into pADL-23c using a <i>Bgl</i> II restriction site.                                    |
|                           | LDB-14-<br><i>His</i>             | GAAGTTCAGCTGCAGGCAAGCGGTGGTGGTTTTGTTTACGCTGGTGGTAGCCTGCG<br>TCTGAGCTGTGCAGCCAGCGGTACCACCTCTCGTTGGGAATCTATGGGCTGGTTTT<br>GCCAGGCACCGGTAAGAAGCTGAATTTGTTAGCGCAATCAGCTGGCAGATAAAT<br>TCTGTTCCATATTATGCCGATAGCGTGAAAGTTCGCTTTACCATTAGCCGTGATAA<br>TAGCAAAAATACCGTTTACCTGCAGATGAATAGTCTGCGTGCAGAAGATACCGCAA<br>CCTATTATTGTGAGCAGCAGCATAACTTCTGGGTCATCGTTATTGGGGTCAGGGC<br>ACCCAGGTTACCCTTAGCAGCAGCCCGGAGGCCAACACCATCACCACCATCAT                                                                                                                                                                                                                                                                                                                                                                                                                                                                                                                                                                                                                                                                                                                                                                                                                                                                                                                                                                                                                                                                                                                                                                                                                                                                                                                                                                                | The CDS was inserted into pADL-23c using a <i>Bgl</i> II restriction site.                                                                                |
|                           | LDB-14-<br><i>Avi-His</i>         | (LDB-14) -<br>AGCCCGGAGGCCAAAGCTTATCCACCCCGAGTGTAGATCTCGGTGGTTCGCGTAT<br>CATTGGTCTGAACGACATCTTCGAGGCTCAGAAAATCGAATGGCAGCAACATCATC<br>ACCACCATCACTCT                                                                                                                                                                                                                                                                                                                                                                                                                                                                                                                                                                                                                                                                                                                                                                                                                                                                                                                                                                                                                                                                                                                                                                                                                                                                                                                                                                                                                                                                                                                                                                                                                                                       | The sequence of LDB-14 is the same as above. The CDS was inserted into pADL-23c using a <i>Bgl</i> II restriction site.                                   |



|                  |                  |                                                                                                                                                                                                                                                                                                                                                                                                                                                                                                                                                                                                                                                                                                                                                                                                                                                                                                                                                                                                                                                                                                                                                                                                                   |                                                                                                                                            |
|------------------|------------------|-------------------------------------------------------------------------------------------------------------------------------------------------------------------------------------------------------------------------------------------------------------------------------------------------------------------------------------------------------------------------------------------------------------------------------------------------------------------------------------------------------------------------------------------------------------------------------------------------------------------------------------------------------------------------------------------------------------------------------------------------------------------------------------------------------------------------------------------------------------------------------------------------------------------------------------------------------------------------------------------------------------------------------------------------------------------------------------------------------------------------------------------------------------------------------------------------------------------|--------------------------------------------------------------------------------------------------------------------------------------------|
|                  | PAS-GAF-Avi-His  | ATGAGTCGTGACCCTTTGCCATTCTTTCCTCCTCTTTATCTGGGTGGACCCGAGAT<br>TACAACAGAAAACCTGCGAACCGCAACCAATTCACATCCCGGGATCTATTCAACCAC<br>ACGGTGCATTGCTGACGGCAGACGGACATTCGGGAGAGGTTTACAGATGTGCTT<br>AACGCAGCAACGTTTCTGGGACAAGAGCCTACGGTTTTGCGCGGCCAGACGTTAGC<br>GGCTCTGTTGCCAGAGCAATGGCCGGCCTTACAGGGGGCATTGCCTCCAGGGTGCC<br>CCGATGCATTGCAATACCGCGCGACACTGGATTGGCCGGCGCGAGGACATCTTCT<br>CTGACAGTCCACCGCTGGGGGAGCTGTTGATCTGGAGTTTGAACCTACGGAGGC<br>CTGGGACTCGACTGGCCCGCACGCGTTACGCAATGCGATGTTGCTCTTGAATCAG<br>CGCCAAACTTGGCGCGGTTAGTGAAGTGGCCACACAACCGTACGGGAGCTTACA<br>GGCTTTGACCGCTGATGTTATACAAATTCGCACCCGATGCGACAGGCGAGGTAAT<br>CGCCGAAGCCCGCGGAGGGGTTGCATGCCTTTCTTGGCCATCGTTTTCCGGCCT<br>CAGATAATCCCGCCCAAGCGCGCGCCCTTTACACTCGCCATCTGCTTCGTTTACT<br>GCGGACACGCGCGCGCGGCGGCTTCCCTTAGACCCAGTACTTAATCCTCAGACTAA<br>CGCTCCTACCCCTTAGGGGGGGCAGTGTGCGTGGCAGCTGCGCTATGCACATGC<br>AGTACCTTCGCAATATGGGCGTGGGCTCCTCTTAAGTGTATCAGTGGTAGTTGGG<br>GGCAGTTATGGGGTCTGATTGCGTGCATCATCAGACCCCTATGTTTTGCCACC<br>AGACCTTCGTACTACTTGAATACTTGGGGGCTTTATTAAGCCTTCAGGTGCAAG<br>TCAAGGAAAAGCTTGGTGGCGGTAGCGAGAATTTGTATTTTCAGGGTGGCGGTGGC<br>AGTAGCTTATCCACCCCGCGACCCGAGCCTCCTCCACCGTCTGACCGTGAACGACAT<br>CTTCGAGGCTCAGAAAATCGAATGGCAGCAATCATCACCACCATCAC | PAS-GAF-Avi-His was constructed by Q5 Site-Directed Mutagenesis Kit (New England Biolabs, E0554S) based on DrBphP-Avi-His.                 |
|                  | PHY-Avi-His      | ATGGCCGCGGACGTTGCTGCATTCCGTCAGTCACTTCGCGAACCCATGCGCGCGT<br>CGCCTTAGCGCGCAGCGCATTCCCTGTGCGCCGACGATACTCTTCCGACCCATGCAC<br>TTGATCTTCTGGGTCTGATGCGTGTGGGGGCTTAATCCTGCGTTTTGAAGGTGCT<br>TGGCAGACGTTAGGAGAAGTCCCGCCGCTCCCGCAGTGCATGCACTGCTTGCATG<br>GCTTGAACCCCAACCAGGGGCGCTTGTTCAGACTGATGCATTGGGGCAGTTGTGGC<br>CGCGGGGGGCTGATTTGGCTCCCTCAGCCGGGGTGTGCTTGCATTTTCAGTAGGG<br>GAGGGATGGAGTGAGTGCTTGGTTGGTTACGTCCCGAACGCGCCTTGAGGTTGG<br>GTGGGGTGGAGCAACTCCAGACCAGGCCAAGGACGACCTGGGCCCTCGTCACAGTT<br>TCGATACTTACTTAGAAGAGAAGCGTGGGTATGCAGAACCCTGGCATCCCGGAGAG<br>ATTGAGGAAGCTCAGGATTTGCGCGCACTCTTACTGGCGCATTAAGCTTGGTGG<br>CGGTAGCGAGAATTTGTATTTTCAGGGTGGCGGTGGCAGTAGCTTATCCACCCCGC<br>CGACCCCGAGCACTCCTCCTACCGGTCTGAACGACATCTTCGAGGCTCAGAAAATC<br>GAATGGCAGCAATCATCACCACCATCAC                                                                                                                                                                                                                                                                                                                                                                                                                                             | PHY-Avi-His was constructed by Q5 Site-Directed Mutagenesis Kit (New England Biolabs, E0554S) based on DrBphP-Avi-His.                     |
|                  | PHY-SNAP-Avi-His | (PHY) -<br>GGATCCGACAAAGACTGCGAAATGAAGCGCACCCACCTGGATAGCCCTCTGGGCAA<br>GCTGGAACTGTCTGGGTGCGAACAGGGCCTGCACCGTATCATCTTCCGTTGGGCAAAG<br>GAACATCTGCCGCCGACGCGCTGGAAGTGCCTGCCCCAGCCGCGTGTGGGCGGA<br>CCAGAGCCACTGATGCAGGCCACCGCTGGCTCAACGCCACTTTCCAGCCTGA<br>GGCCTCGAGGAGTTCCCTGTGCCAGCCCTGCACCACCCAGTGTTCAGCAGGAGA<br>GCTTTTACCCGCGAGGTGCTGTGAAACTGCTGAAAGTGGTGAAGTTCCGAGAGGTC<br>ATCAGCTACAGCCACTGGCCGCCCTGGCCGGCAATCCCGCCGACCCGCGCCGCT<br>GAAAACCGCCCTGAGGGGAAATCCCGTGCCTATTCTGATCCCTGCCACCGGGTGG<br>TGCAGGGCGACTGGACGTGGGGGGCTACGAGGGCGGGCTCGCCGTGAAAGAGTGG<br>CTGCTGGCCACGAGGGCCACAGACTGGGCAAGCCTGGGTTGGGTCGGGAGGCGCA<br>AAGCTTATCCACCCCGCCGACCCGAGCACTCCTCCTACCGGTCTGAACGACATCT<br>TCGAGGCTCAGAAAATCGAATGGCAGCACTCGAGCACCACCACCACCACC                                                                                                                                                                                                                                                                                                                                                                                                                                                                             | The sequence of PHY is the same as above. The CDS was inserted into pLGSa vector using <i>NdeI/BamHI</i> restriction sites.                |
| Yeast two-hybrid | GAL4-DrBphP      | ATGAAGCTACTGTCTTCTATCGAACAGCATGCGATATTTGCCGACTTAAAAAGCT<br>CAAGTGTCCAAAGAAAAACCGAAGTGCGCCAAGTGTCTGAAGAACAACCTGGGAGT<br>GTCCGCTACTCTCCAAAACCAAAAGTCTCCCGTACTAGGGCAGACATCTGACAGAA<br>GTGGAATCAAGGCTAGAAAGACTGGAACAGCTATTTCTACTGATTTTCTCAGAGA<br>AGACCTTGACATGATTTTGAATGGATTCTTTACAGGATATAAAAGCATTGTTAA<br>CAGGATATTTGTACAAGATAATGTGAATAAAGATGCCGTACAGATAGATTGGCT<br>TCAGTGGAGACTGATATGCCTCTAACATTGAGACAGCATAGAATAAGTGGCAGATC<br>ATCATCGGAAGAGAGTAGTAACAAAGTCAAAGACAGTTGACTGTATCGCCGAAAT<br>TTGTAATACGACTCACTATAGGGCGAGCCGCATCATGGAGGAGCAGAAGCTGATC<br>TCAGAGGAGGACCTGCAT- (DrBphP)                                                                                                                                                                                                                                                                                                                                                                                                                                                                                                                                                                                                                                  | The sequence of DrBphP is the same as above. The CDS was inserted into pGBKT7 vector (Clontech) using <i>NdeI/BamHI</i> restriction sites. |
|                  | AD-LDB-3         | ATGGATAAAGCGGAATTAATTCCCGAGCCTCCAAAAAAGAAGAGAAAGGTCGAATT<br>GGGTACCAGCCCAATTTAATCAAAGTGGGAATATTGCTGATAGCTCATTTGTCCT<br>TCACTTTCACTAACAGTAGCAACGGTCCGAACCTCATAACAACCTCAAACAATTTCT<br>CAAGCGCTTTCACAACCAATTCGCTCCTCTAACGTTTCATGATAAATTCATGAATA<br>TGAAATCACGGCTAGTAAAATGATGATGGTAATAAATCAAACCACTGTCACTG<br>GTTGGACGGACCAAACTGCGTATAACGCGTTTGGAAATCACTACAGGGATGTTAAT<br>ACCAC TACAATGGATGATGATATAACTATCTATTGATGATGAAGATACCCACC<br>AAACCAAAAAAAGAGATCTTTAATACGACTCACTATAGGGCGAGCGCCGCATGG<br>AGTACCATAACGACTACAGATTACGCTCATATGGGAGGCGGTTCCGGTGGCGGT<br>TCT- (LDB-3)                                                                                                                                                                                                                                                                                                                                                                                                                                                                                                                                                                                                                                                   | The sequence of LDB-3 is the same as above. The CDS was inserted into pGADT7 (Clontech) using <i>NdeI/BamHI</i> restriction sites.         |
|                  | AD-LDB-4         | (AD) -<br>ATCTTTAATACGACTCACTATAGGGCGAGCGCCCATGGAGTACCACACGACGCT<br>ACCAGATTACGCTCATATGGGAGGCGGTTCCGGTGGCGGTTCTGAAGTTCAGCTGC<br>AGGCAAGCGGTGGTGGTTTTGTTACGCTGTGGTGGTACCGCTGCGTCTGAGCTGTGCA<br>GCCAGCGGTGATACCTTACTGTACTCTATGGGCTGGTTTCGCCAGGCACCGGG                                                                                                                                                                                                                                                                                                                                                                                                                                                                                                                                                                                                                                                                                                                                                                                                                                                                                                                                                               | The CDS was inserted into pGADT7 using <i>NdeI/BamHI</i> restriction sites. The                                                            |

|                      |                |                                                                                                                                                                                                                                                                                                                                                                                                                                                                                                                                                                                                                                                                                                                                                                                                                                                                                                                                                                                                                                                                                        |                                                                                                                                                                     |
|----------------------|----------------|----------------------------------------------------------------------------------------------------------------------------------------------------------------------------------------------------------------------------------------------------------------------------------------------------------------------------------------------------------------------------------------------------------------------------------------------------------------------------------------------------------------------------------------------------------------------------------------------------------------------------------------------------------------------------------------------------------------------------------------------------------------------------------------------------------------------------------------------------------------------------------------------------------------------------------------------------------------------------------------------------------------------------------------------------------------------------------------|---------------------------------------------------------------------------------------------------------------------------------------------------------------------|
|                      |                | TAAAGAACGTGAATTTGTTAGCGCAATCAGCTGGTGGTGGAACTGACTCAGTATT<br>ATGCCGATAGCGTAAAAGGTCGCTTTACCATTAGCCGTGATAATAGCAAAAATACC<br>GTTTACCTGCAGATGAATAGTCTGCGTGCAGAAGATACCGCAACCTATTATTGTGC<br>ATGGTCTATCTACTTTCCACCAGGTAACGATTACAACGGTTACCATTATTGGGGTC<br>AGGGCACCCAGGTTACCGTTAGCAGC                                                                                                                                                                                                                                                                                                                                                                                                                                                                                                                                                                                                                                                                                                                                                                                                              | sequences of AD and LDB-14 are the same as above.                                                                                                                   |
|                      | AD-LDB-6       | (AD) -<br>ATCTTTAATACGACTCACTATAGGGCGAGCGCCGCCATGGAGTACCCATACGACGT<br>ACCAGATTACGCTCATATGGGAGGCGGTTCCGGTGGCGGTTCTGAAGTTCAGCTGC<br>AGGCAAGCGGTGGTGGTTTTGTTACGCTGGTGGTAGCCTGCGTCTGAGCTGTGCA<br>GCCAGCGGTTTTTTTTCTAACTGGTCTGATATGGGCTGGTTTCGCCAGGCACCGGG<br>TAAAGAACGTGAATTTGTTAGCGCAATCAGCTTTTGGGCAGATGGTACTGAATATT<br>ATGCCGATAGCGTAAAAGGTCGCTTTACCATTAGCCGTGATAATAGCAAAAATACC<br>GTTTACCTGCAGATGAATAGTCTGCGTGCAGAAGATACCGCAACCTATTATTGTGC<br>ATGGTACGGTCCAGTTAACGGTTTTTACATGTTTGATTATTGGGGTCAGGGCACCC<br>AGGTTACCGTTAGCAGC                                                                                                                                                                                                                                                                                                                                                                                                                                                                                                                                                             |                                                                                                                                                                     |
|                      | AD-LDB-7       | (AD) -<br>ATCTTTAATACGACTCACTATAGGGCGAGCGCCGCCATGGAGTACCCATACGACGT<br>ACCAGATTACGCTCATATGGGAGGCGGTTCCGGTGGCGGTTCTGAAGTTCAGCTGC<br>AGGCAAGCGGTGGTGGTTTTGTTACGCTGGTGGTAGCCTGCGTCTGAGCTGTGCA<br>GCCAGCGGTTTACCTCTGATTTGAATCTATGGGCTGGTTTCGCCAGGCACCGGG<br>TAAAGAACGTGAATTTGTTAGCGCAATCAGCTCTTGGTTTACTAATCCACCATATT<br>ATGCCGATAGCGTAAAAGGTCGCTTTACCATTAGCCGTGATAATAGCAAAAATACC<br>GTTTACCTGCAGATGAATAGTCTGCGTGCAGAAGATACCGCAACCTATTATTGTGC<br>ACATCGTTCTATCTGGTACCATCCAACCTATTGGGGTCAGGGCACCCAGGTTACCG<br>TTAGCAGC                                                                                                                                                                                                                                                                                                                                                                                                                                                                                                                                                                        |                                                                                                                                                                     |
|                      | AD-LDB-14      | (AD) -<br>ATCTTTAATACGACTCACTATAGGGCGAGCGCCGCCATGGAGTACCCATACGACGT<br>ACCAGATTACGCTCATATGGGAGGCGGTTCCGGTGGCGGTTCT- (LDB-14)                                                                                                                                                                                                                                                                                                                                                                                                                                                                                                                                                                                                                                                                                                                                                                                                                                                                                                                                                            |                                                                                                                                                                     |
| Mammalian two-hybrid | GAL4-DrBphP    | GAL4-DrBphP                                                                                                                                                                                                                                                                                                                                                                                                                                                                                                                                                                                                                                                                                                                                                                                                                                                                                                                                                                                                                                                                            | The sequence of GAL4-DrBphP is the same as above. The CDS was inserted into pBobi (see below for the sequence) using <i>Bam</i> HI/ <i>Xho</i> I restriction sites. |
|                      | NLS-LDB-3-p65  | ATGGGATCCCCAAGAAGAAGCGCAAGGTGGAAGCTAGCGCTTCCCCGAAGAAAAA<br>CGCGAAAGTCGAGGCCCTCCGCATCTCCAAAAAAGCAAGGTTGAAGCATCTG<br>GATCCGGTACCGGAGGAAGTGGCAGCTCTGGCGGCAGTGGAGGGTCTGGTGGCAG<br>GGA- (LDB-3) -<br>AGCGGGCGCGGTGGCAGTCACTACCTGCCAGATACAGACGATCGTCCAGGATTGA<br>GGAGAAACGTAAAAGGACATATGAGACCTTCAAGAGCATCATGAAGAAGAGTCCCTT<br>TCAGCGGACCCACCGACCCCGGCCCTCCACCTCGACGATGCTGTGCCTTCCCAGC<br>AGCTCAGCTTCTGTCCCAAGCCAGCACCCAGCCCTATCCCTTTACGTCATCCCT<br>GAGCACCATCAACTATGATGAGTTTCCCACCATGGTGTTCCTTCTGGGCAGATCA<br>GCCAGGCTCGGCCTTGGCCCCGGCCCTCCCCAAGTCCCTGCCAGGCTCCAGCC<br>CCTGCCCTGCTCCAGCCATGGTATCAGCTCTGGCCAGGCCCCAGCCCTGTCCC<br>AGTCCTAGCCCCAGGCCCTCCTCAGGCTGTGGCCCCACCTGCCCAAGCCACCC<br>AGGCTGGGGAAGGAACGCTGTCAGAGGCCCTGCTGCAGCTGCAGTTTATGATGAA<br>GACCTGGGGGCTTGTCTGGCAACAGCACAGACCCAGCTGTGTTTACAGACCTGGC<br>ATCCGTCGACAACCTCCGAGTTTTCAGCAGCTGCTGAACCAGGGCATACTGTGGCCC<br>CCCACACAACCTGAGCCCATGCTGATGGAGTACCCTGAGGCTATAACTCGCCTAGTG<br>ACAGGGGGCCAGAGGCCCCCGACCCAGCTCCTGCTCCACTGGGGGGCCCCGGGCT<br>CCCCAATGGCTCCTTTCAGGAGATGAAGACTTCTCCTCCATTGCCGACATGGACT<br>TCTCAGCCCTGCTGAGTCAGATCAGCTCC | The CDS was inserted into pBobi vector using <i>Bam</i> HI/ <i>Xho</i> I restriction sites. The sequence of LDB-3 is the same as above.                             |
|                      | NLS-LDB-4-p65  | (NLS) -<br>GGATCCGGTACCGGAGGAAGTGGCAGCTCTGGCGGCAGTGGAGGGTCTGGTGGCAG<br>CGGA- (LDB-4) -AGCGGGCGCGGTGGCAGT- (p65)                                                                                                                                                                                                                                                                                                                                                                                                                                                                                                                                                                                                                                                                                                                                                                                                                                                                                                                                                                        | The sequences of NLS, nanobody and p65 are the same as above. The CDS was inserted into pBobi using <i>Bam</i> HI/ <i>Xho</i> I restriction sites.                  |
|                      | NLS-LDB-6-p65  | (NLS) -<br>GGATCCGGTACCGGAGGAAGTGGCAGCTCTGGCGGCAGTGGAGGGTCTGGTGGCAG<br>CGGA- (LDB-6) -AGCGGGCGCGGTGGCAGT- (p65)                                                                                                                                                                                                                                                                                                                                                                                                                                                                                                                                                                                                                                                                                                                                                                                                                                                                                                                                                                        |                                                                                                                                                                     |
|                      | NLS-LDB-7-p65  | (NLS) -<br>GGATCCGGTACCGGAGGAAGTGGCAGCTCTGGCGGCAGTGGAGGGTCTGGTGGCAG<br>CGGA- (LDB-7) -AGCGGGCGCGGTGGCAGT- (p65)                                                                                                                                                                                                                                                                                                                                                                                                                                                                                                                                                                                                                                                                                                                                                                                                                                                                                                                                                                        |                                                                                                                                                                     |
|                      | NLS-LDB-14-p65 | ATGCCAAGAAGAAGCGCAAGGTGGAAGCTAGCGCTTCCCCGAAGAAAAAGCGGAA<br>AGTCCAGGCCCTCCGCATCTCCAAAAAAGCAAGGTTGAAGCATCTGGATCCG<br>GAGGCGGTTCCGGTGGCGGTTCT- (LDB-14) -<br>GGTACCGGAGGAAGTGGCAGCTCTGGCGGCAGTGGAGGGTCTGGTGGCAGCGGA-<br>(p65) -GGAGGAAGTGGCAGCTCTGGCGGCAGTGA                                                                                                                                                                                                                                                                                                                                                                                                                                                                                                                                                                                                                                                                                                                                                                                                                              | The CDS was inserted into pcDNA3 (Invitrogen) using <i>Hind</i> III/ <i>Xho</i> I restriction sites. The sequences of LDB-14 and p65                                |

|                      |                                                                                                                                                                                                                                                                                                                                                                                                                                                                                                                                                                                                                                                                                                                                                                                                                                                                                                                                                                                                                                                                                                                                                                                                                                                                                                                                                                                                                                                                                                                                                                                                                                                                                                                                                                                                                                                                                                                                                                                                                                                                                                                                                                                                                                                                                                                                                                                                                                                                                                                                                                                            |                                                                                                                           |
|----------------------|--------------------------------------------------------------------------------------------------------------------------------------------------------------------------------------------------------------------------------------------------------------------------------------------------------------------------------------------------------------------------------------------------------------------------------------------------------------------------------------------------------------------------------------------------------------------------------------------------------------------------------------------------------------------------------------------------------------------------------------------------------------------------------------------------------------------------------------------------------------------------------------------------------------------------------------------------------------------------------------------------------------------------------------------------------------------------------------------------------------------------------------------------------------------------------------------------------------------------------------------------------------------------------------------------------------------------------------------------------------------------------------------------------------------------------------------------------------------------------------------------------------------------------------------------------------------------------------------------------------------------------------------------------------------------------------------------------------------------------------------------------------------------------------------------------------------------------------------------------------------------------------------------------------------------------------------------------------------------------------------------------------------------------------------------------------------------------------------------------------------------------------------------------------------------------------------------------------------------------------------------------------------------------------------------------------------------------------------------------------------------------------------------------------------------------------------------------------------------------------------------------------------------------------------------------------------------------------------|---------------------------------------------------------------------------------------------------------------------------|
|                      |                                                                                                                                                                                                                                                                                                                                                                                                                                                                                                                                                                                                                                                                                                                                                                                                                                                                                                                                                                                                                                                                                                                                                                                                                                                                                                                                                                                                                                                                                                                                                                                                                                                                                                                                                                                                                                                                                                                                                                                                                                                                                                                                                                                                                                                                                                                                                                                                                                                                                                                                                                                            | are the same as above.                                                                                                    |
| <b>GAL4-RpBph P1</b> | <p>(GAL4) –</p> <p>CCGGAATTTGTAATACGACTCACTATAGGGCCGAGCCGCCATCATGGAGGAGCAGAA<br/> GCTGATCTCAGAGGAGGACCTGCATGTGGCAGGTCATGCCTCTGGCAGCCCCGCAT<br/> TCGGGACCGCCGATCTTTCAATTGCGAACGTGAAGAGATCCACCTCGCCGGCTCG<br/> ATCCAGCCGCATGGCGCGCTTCTGGTCTCAGCGAGCCGGATCATCGCATATCCA<br/> GGCCAGCGCCAACGCCGCGGAATTTCTGAATCTCGGAAGCGTGCTCGGCGTCCGC<br/> TCGCCGAGATCGACGGCGATCTGTTGATCAAGATCCTGCCGCATCTCGATCCCACC<br/> GCCGAAGGCATGCCGGTCGCGGTGCGCTGCCGGATCGGCAATCCCTCCACGGAGTA<br/> CGACGGTCTGATGCATCGGCCCTCCGGAAGGCGGGCTGATCATCGAGCTCGAACGTG<br/> CCGCCCGCCGATCGATCTGTCCGGCACGCTGGCGCCGGCGCTGGAGCGGATCCGC<br/> ACGGCGGGCTCGCTGCGCGCGCTGTGCGATGACACCGCGCTGCTGTTTCAGCAGTG<br/> CACCGCTACGACCGGGTGTGGTGTATCGCTTCGACGAGCAGGGCCACGGCGAAG<br/> TGTTCTCCGAGCGCCACGTGCCGGGCTCGAATCCTATTTCCGCAACCGCTATCCG<br/> TCGTCGGACATTCGCGAGATGGCGCGCGGCTGTACGAGCGGCAGCGCGTCCGCGT<br/> GCTGGTTCGACGTCAGCTATCAGCCGGTCCCGTGGAGCCGGCGGCTGTCCGCGTGA<br/> CCGGGCGCATCTCGACATGTCCGGTGTCTTCTGCGCTCGATGTCCGCGATCCAT<br/> CTGCAGTACCTGAAGAACATGGGCGTGCGGCCACCCTGGTGGTGTGCTGGTGGT<br/> CGCGCGCAAGTGTGGGGCCTGGTTGCCGTGCACATTATCTGCCGCGCTTCATCC<br/> ATTTCCGAGCTCGGGCGATCTGCGAACTGCTCGCGAAGCGATCGCGACGCGGATC<br/> ACCGCGCTTGAGAGCTTCGCGCAGAGCCAGTCGGAGCTGTTGCTGCAGCGGCTCGA<br/> ACAGCGCATGATCGAAGCGATCACCGTGAAGGCGATTGGCGCGCAGCGATTTTCG<br/> ACACCAGCCAAATCGATCCTGCAGCCGCTGCACGCCGACGGTTCGCGCGTGGTGTAC<br/> GAAGACCAGATCAGGACCATCGGTGACGTACCTTCCACGCAGGATGTTCCGCGAGAT<br/> CGCCGGTGGCTCGATCGCCAGCCAGTGCAGCGGTCGACCTCGACCGCGTCCGCTCG<br/> GTCTCGACGTGCCGGAGCTCGCGCATCTGACGCGGATGGCGAGCGCGTGGTCCGC<br/> GCGCCGATTTCCGATCATCGCGGCGAGTTTCTGATGTGGTTCCGCCCCGAGCGCGT<br/> CCACACCGTTACCTGGGGCGGCGATCCGAAGAAGCCGTTACGATGGGCGATACAC<br/> CGGCGGATCTGTCCGCGGGGCTCCTTCGCCAAATGGCATCAGGTTGTGGAAGGC<br/> ACGTCGATCCGTGGACGGCCCGCATCTCGCCGGGCTCGCACCATCGGTCCAGAC<br/> CGTCGCGACATCGTCTGCAATTCGCGCGGTCGGGACACTGATCGCCCCGCAAC<br/> AGTACGAACAGTTTTCTGTCAGGTCACGCTTCGATGCAGCCGGTGTGATCACC<br/> GACGCGAAGGCGCATCCTGCTGATGAACGACTCGTTCGCGCATGTTGCCGGC<br/> GGGTCGCCATCCGCGCTCCATCTCGACGATCTCGCCGGGTTCTTCGTGCAATCGA<br/> ACGATTTCTGCGCAACGTGCGGCAACTGATCGATCAGGGCCGGGTGGCGCGGC<br/> GAAGTTCTGTGCGCGGCGCAGGTAATCGCCGTTGCGCGTGGCAGTGCAGCGCGA<br/> TCCGGTTCGCGCACGAGGACAGTCCGCTCGGCTTCGTGCTGATCTTCAGCGACG<br/> CTACCGATCGTCGACCGCAGATGCCGACGACGCGTTCAGGAAAGGCATTTCT<br/> GCCAGCGACGTCGCGGCTGCGGCTCGACTCCAAGTCCGACCTCTTGCACGAGAA<br/> GCTGTGTCCGCGTGGTCGAGAACGCGCAGCTTGCAGCATTTGAAATTACTTACG<br/> GGTCGAGACGGGACGATCGCCGAGTGTGCTCGAAGGCGTTCCGCGATCGATGCTG<br/> CGCACCGCCGAAGTGTCCGCCATCTGGTGCAGCACGCGCGCGCACGGCCGGCAG<br/> CGACAGCTCGAGCAATGGCTCGCAGAACAAGAAAG</p> | The CDS was subcloned into pcDNA3 using <i>HindIII/XhoI</i> restriction sites. The sequence of GAL4 is the same as above. |
| <b>NLS-PpsR2-p65</b> | <p>ATGCCAAGAAGAAGCGCAAGGTGGAAGCTAGCGCTTCCCGAAGAAAAAGCGGAA<br/> AGTCGAGGCTCCGCATCTCCAAAAAAGCAAGGTTGAAGCATCTGGATCCG<br/> GAGGGCGTTCCGGTGGCGGTTCTGTGGCGTCAAAGTCCGTTTCATGCCGACATCACC<br/> CTTCTGCTCGATATGGAGGGTGTGATTCGCGAAGCCACCTGTCTCCGACGATGGC<br/> GGCCGAGAGCGTGGACGGTTGGCTGGGGCGTCCGTTGGAGCGACATCGCCCGCGCG<br/> AAGGCGGCGACAAGGTTCCGCCGATGGTCAAGACGCGCCGCGCAGCGGCATCTCG<br/> GCTTTCCGCCAGATCAATCAGCCTTTCCCGAGCGGCTCGAAATCCCGATCGAATT<br/> CACCAGATGCTGCTGGGCGACCGCACCGGATGATCGCGGTCGGCAAGAACAATGC<br/> AGGCGGTCACCGAGCTGCATTTCCCGGCTGATCGCTGCGCAGCAGGCGATGGAGCGC<br/> GACTATTGGCGGTTGCGTGAATTTGGAGACTCGCTACCGCCTGGTGTTCGACGCTGC<br/> CGCCGATGCGGTGATGATCGTCTCCCGCGGACATGCGCATCGTCAAGCCAACC<br/> GGGCGGCGGTGAATGCGATCAGCCGCTCGAGCGCGGCAATGACGACCTTGGCGGG<br/> CGTGAATTCCTCGCCGAAGTGGCGGCTGCCGATCGCGATGCGGTGCGCGACATGCT<br/> GGCCAGGTGCGTCAGCGCGGACCGCACTCAGCGTCTCGTTTCATCTCGGCGGTT<br/> ACGACCGCGCCTGGATGCTGCGCGGTTCCGCTGATGTGCTCCGAGCGTTCGTAGGTT<br/> TTCCTGCTGCACTTCAACCCGGTGACCAGACTCCCGGATCGACGACGTCGACGTA<br/> TGATCCGCTGCTGCGCGGGCTGATCGATCGCATTTCCGACGGGTTTCGTCCGACTGG<br/> ATTCCGAAGGCGTCTGTCGTCACGCCAACCAGGCGTTTCTCGATCTGGTCCAGATC<br/> GGCTCAAGCCTGCGCGGTCGGACGATCGTGGGCGTTCGATGGTTCGTCCGGT<br/> CGCCGATCTGTCCAGCTTGTGACGCTGTGCGGCGCTACAAGACGGTGGCGGCTGT<br/> TCCAAACGACGATCCGCGGCGAGCTCGGACCGAGACTGAAGTTCAGGCTTCGCGC<br/> GTCGACGCGGAGGACGACCAATACATCGGCGTTCGTGATGCGCAATGTCCGCGGACG<br/> CCTCGACGCTGCGGACGACCACGATGCCTTCCGCTCAGGCGCTCGGCCGATCAGCA<br/> AGCAGCTCGGGCGATCCTCGCTGCGCAAGCTGGTGAAGAACCGCGTGGCAGTGTG<br/> GAGCAGCACTACGTGAAGGAAGCGCTGTTGCGATCCAAGGGCAATCGCACGGCAAC<br/> TGCCGAATGCTCGGATTGAGCGGCGAGCGCTTTATGCAAACTCAACTCTACG<br/> GCTTCGACGACAAGGTTGCTGTTGCTTCTGCTGCCGACGGTGCAGAGGGCGCCTCA</p>                                                                                                                                                                                                                                                                                                                                                                                                                                                                                                                                                                                                                                                                                                                                                                                                                                                                        | The CDSs were inserted into pcDNA3 using <i>HindIII/XhoI</i> restriction sites. The sequence of p65 is the same as above. |

|                                                     |                     |                                                                                                                                                                                                                                                                                                                                                                                                                                                                                                                                                                                                                                                                                                                                                                    |                                                                                                                                                    |
|-----------------------------------------------------|---------------------|--------------------------------------------------------------------------------------------------------------------------------------------------------------------------------------------------------------------------------------------------------------------------------------------------------------------------------------------------------------------------------------------------------------------------------------------------------------------------------------------------------------------------------------------------------------------------------------------------------------------------------------------------------------------------------------------------------------------------------------------------------------------|----------------------------------------------------------------------------------------------------------------------------------------------------|
|                                                     |                     | GACGACGCAGAGGATGGTACCGGAGGAAGTGGCAGCTCTGGCGGCAGTGGAGGGTCTGGTGGCAGCGGA- (p65) -GGAGGAAGTGGCAGCTCTGGCGGCAGTGGAA                                                                                                                                                                                                                                                                                                                                                                                                                                                                                                                                                                                                                                                      |                                                                                                                                                    |
|                                                     | NLS-Q-PAS1-p65      | ATGCCCAAGAAGAAGCGCAAGGTGGAAGCTAGCCCTTCCCCGAAGAAAAGCGGAAAGTCGAGGCCTCCGCATCTCCAAAAAAGCAAGGTTGAAGCATCTGGATCCGGAGGCGGTTCCGGTGGCGGTTCTGGCAAGAACATGCAGGCCGTCACCGAGCTGCAT                                                                                                                                                                                                                                                                                                                                                                                                                                                                                                                                                                                                 |                                                                                                                                                    |
| Detection of nanobody expression in mammalian cells | LDB-3-SNAP          | ATGGGATCC- (LDB-3) -GTTAACGGCGGCGGTGGCAGTGACAAAGACTGCGAAATGAAGCGCACCCCTGGATAGCCCTCTGGCAAGCTGGAAGTGTCTGGGTGCGAACAGGGCCTGCACCGTATCATCTTCTCTGGGCAAAGAACATCTGCCGCCGACGCCGTGGAAGTGCCTGCCCCAGCCGCCGTGGCGGACCAGAGCCACTGATGCAGGCCACCGCTGGCTCAACGCCTACTTCCACAGCCTGAGGCCATCGAGGAGTTCCTGTGCCAGCCCTGCACCCAGTGTTCAGCAGGAGAGCTTTACCCGCCAGGTGCTGTGAAACTGCTGAAAGTGGTG                                                                                                                                                                                                                                                                                                                                                                                                              | The CDS was inserted into pBobi vector using <i>Bam</i> HI/ <i>Xho</i> I restriction sites. The sequence of LDB-3 is the same as above.            |
|                                                     | LDB-4-SNAP          | ATGGGATCC- (LDB-4) -GTTAACGGCGGCGGTGGCAGT- (SNAP)                                                                                                                                                                                                                                                                                                                                                                                                                                                                                                                                                                                                                                                                                                                  | The CDSs were inserted into pBobi using <i>Bam</i> HI/ <i>Xho</i> I restriction sites. The sequences of nanobodies and SNAP are the same as above. |
|                                                     | LDB-6-SNAP          | ATGGGATCC- (LDB-6) -GTTAACGGCGGCGGTGGCAGT- (SNAP)                                                                                                                                                                                                                                                                                                                                                                                                                                                                                                                                                                                                                                                                                                                  |                                                                                                                                                    |
|                                                     | LDB-7-SNAP          | ATGGGATCC- (LDB-7) -GTTAACGGCGGCGGTGGCAGT- (SNAP)                                                                                                                                                                                                                                                                                                                                                                                                                                                                                                                                                                                                                                                                                                                  |                                                                                                                                                    |
|                                                     | LDB-14-SNAP         | ATGGGATCC- (LDB-14) -GTTAACGGCGGCGGTGGCAGT- (SNAP)                                                                                                                                                                                                                                                                                                                                                                                                                                                                                                                                                                                                                                                                                                                 |                                                                                                                                                    |
| Colocalization in mammalian cells                   | DrBpHP - AcGFP-CAAX | ATGGGATCC- (DrBpHP) -GTTGGCTCGAGCGGTGGTGGCGGGAGCGGAGGTATGGTGAGCAAGGGCGCCGAGCTGTTACCCGGCATCGTGCCATCCTGATCGAGCTGAATGGCGATGTGAATGGCCACAAGTTACGCTGAGCGCGAGGGCGAGGGCGATGCCACCTACGGCAAGCTGACCCCTGAAGTTACATCTGCACCCCGCAAGCTGCCTGTGCCCTGGCCACCCCTGGTGACCACCTGAGCTACGGCGTGCACTGCTTCTCAGCTACCCCGATCACATGAAGCAGCACGACTTCTCAAGAGCGCCATGCCTGAGGGCTACATCCAGGAGCGCACCATCTTCTTGAGGATGACGGCAACTACAAGTCGCGCGCCGAGGTGAAGTTGAGGGCGATACCCCTGGTGAATCGCATCGAGCTGACCGGCACCGATTTCAAGGAGGATGGCAACATCCTGGCAATAAGATGGAGTACAACACTACAACGCCCAATGTGTACATCATGACCGACAAGGCCAAGAATGGCATCAAGGTGAAGTCAAGATCCGCCACAACATCGAGGATGGCAGCGTGACGCTGGCCGACCACTACCAGCAGAATACCCCATCGCGATGGCCCTGTGC                                                                                                                 | The CDSs were inserted into pBobi using <i>Bam</i> HI/ <i>Xho</i> I restriction sites. The sequence of DrBpHP is the same as above.                |
|                                                     | LDB-3-mCherry       | ATGGGATCC- (LDB-3) -GTTGGCTCGAGCGGTGGTGGCGGGAGCGGAGGTATGGTGAGCAAGGGCGAGGAGGATAACATGGCCATCATCAAGGAGTTCATGCGCTTCAAGGTGCACATGGAGGGTCCGTGAACGGCCACGAGTTCGAGATCGAGGGCGAGGGCGAGGGCCGCCCTACGAGGGCACCCAGACCGCAAGCTGAAGGTGACCAAGGTGGCCCCCTGCCCTTCGCCCTGGGACATCCTGTCCCCTCAGTTCATGTACGGCTCCAAGGCTACGTGAAGCACCCCGCCGACATCCCAGCTACTTGAAGCTGTCTTCCCAGGGCTTCAAGTGGGAGCGCGTGATGAATTCGAGGACGGCGGTGGTACCGTGACCCAGGACTCCTCCCTGCAGGACGGCGAGTTCATCTACAAGGTGAAGTGCAGCGGCACCAACTCCCCTCCGACGGCCGTAATGCAGAAGAAGACCATGGGTGGGAGGCCCTCCGAGCGGATGTACCCCGAGGACGGCGCGGTGAAGGCGAGATCAAGCAGAGGCTGAAGTGAAGGACGGCGCCACTACGACGCTGAGGTCAAGACCCTACAAGGCCAAGAGCCCGTGCAGCTGCCGGCCCTACAACGTCACATCAAGTTGGACATCACTCCACAACGAGGACTACACCATCGTGGAAAGTACGAACCGCGCCGAGGGCCGCACTCCACCGCGGCATGGACGAGCTGTACAAGTCCGGAAC | The CDSs were inserted into pBobi using <i>Bam</i> HI/ <i>Xho</i> I restriction sites. The sequence of LDB-3 is the same as above.                 |
|                                                     | pBobi vector        | TGACGGATCGGGAGATCTCCCAGTCCCTATGGTGCAGTCTCAGTACAATCTGCTCTGATGCCGATAGTTAAGCCAGTATCTGCTCCTGCTTGTGTGTTGGAGGTGCGCTGAGTAGTGCAGCAAAAATTAAGCTACAACAAGGCAAGGCTTGACCGACAATTGC                                                                                                                                                                                                                                                                                                                                                                                                                                                                                                                                                                                                |                                                                                                                                                    |

|  |                                                                                                                                                                                                                                                                                                                                                                                                                                                                                                                                                                                                                                                                                                                                                                                                                                                                                                                                                                                                                                                                                                                                                                                                                                                                                                                                                                                                                                                                                                                                                                                                                                                                                                                                                                                                                                                                                                                                                                                                                                                                                                                                                                                                                                                                                                                                                                                                                                                                                                                                                                                                                                                                                                                                                                                                                                                                                                                                                                                                                                                                                                                                                                                                                                                                                                                                                                                                                                                                                                                                                                                                                                                                                                                                                                                                                                                                                                                                                                                                                                                                                                                                                                                                                                                                                                                                                                                                                                                                                                                                      |  |
|--|--------------------------------------------------------------------------------------------------------------------------------------------------------------------------------------------------------------------------------------------------------------------------------------------------------------------------------------------------------------------------------------------------------------------------------------------------------------------------------------------------------------------------------------------------------------------------------------------------------------------------------------------------------------------------------------------------------------------------------------------------------------------------------------------------------------------------------------------------------------------------------------------------------------------------------------------------------------------------------------------------------------------------------------------------------------------------------------------------------------------------------------------------------------------------------------------------------------------------------------------------------------------------------------------------------------------------------------------------------------------------------------------------------------------------------------------------------------------------------------------------------------------------------------------------------------------------------------------------------------------------------------------------------------------------------------------------------------------------------------------------------------------------------------------------------------------------------------------------------------------------------------------------------------------------------------------------------------------------------------------------------------------------------------------------------------------------------------------------------------------------------------------------------------------------------------------------------------------------------------------------------------------------------------------------------------------------------------------------------------------------------------------------------------------------------------------------------------------------------------------------------------------------------------------------------------------------------------------------------------------------------------------------------------------------------------------------------------------------------------------------------------------------------------------------------------------------------------------------------------------------------------------------------------------------------------------------------------------------------------------------------------------------------------------------------------------------------------------------------------------------------------------------------------------------------------------------------------------------------------------------------------------------------------------------------------------------------------------------------------------------------------------------------------------------------------------------------------------------------------------------------------------------------------------------------------------------------------------------------------------------------------------------------------------------------------------------------------------------------------------------------------------------------------------------------------------------------------------------------------------------------------------------------------------------------------------------------------------------------------------------------------------------------------------------------------------------------------------------------------------------------------------------------------------------------------------------------------------------------------------------------------------------------------------------------------------------------------------------------------------------------------------------------------------------------------------------------------------------------------------------------------------------------------|--|
|  | <p>ATGAAGAATCTGCTTAGGGTTAGGCGTTTTGCGCTGCTTCGCGATGTACGGGCCAG<br/> ATATACCGCGTTGACATTGATTATTGACTAGTTATTAATAGTAATCAATTACGGGGT<br/> CATTAGTTCATAGCCCATATATGGAGTTCGCCGTTACATAACTTACGGTAAATGGC<br/> CCGCTGGCTGACCGCCCAACGACCCCGCCATTGACGTCAATAATGACGTATGT<br/> TCCCATAGTAACGCCAATAGGGACTTCCATTGACGTCAATGGGTGGACTATTTAC<br/> GGTAAACTGCCCACTTGGCAGTACATCAAGTGTATCATATGCCAAGTACGCCCCCT<br/> ATTGACGTCAATGACGGTAAATGGCCCGCTGGCATTATGCCCAGTACATGACCTT<br/> ATGGGACTTTTCCACTTGGCAGTACATCTACGTATTAGTCATCGCTATTACCATTGG<br/> TGATGCGGTTTTTGGCAGTACATCAATGGGCGTGGATAGCGGTTTTGACTCACGGGGA<br/> TTTCCAAGTCTCCACCCATTGACGTCAATGGGAGTTTTGTTTTGGCACCAAAATCA<br/> ACGGGACTTTCCAAAATGTCGTAACAACTCCGCCCATTTGACGCAAAATGGGCGGTA<br/> GGCGGTACGGTGGGAGGTCTATATAAGCAGCGCGTTTTGCCTGTACTGGGTCTCT<br/> CTGGTTAGACCAGATCTGAGCCTGGGAGCTCTCTGGTAACTAGGGAACCCACTGC<br/> TTAAGCCTCAATAAAGCTTGCCTTGAGTGTCTCAAGTAGTGTGTGCCGCTGTGTTG<br/> TGTGACTCTGGTAACTAGAGATCCCTCAGACCTTTTAGTCAGTGTGGAAAATCTC<br/> TAGCAGTGGCGCCCAACAGGGACCTGAAAAGCGAAAAGGAAACAGAGCTCTCTCG<br/> ACGCAGGACTCGGCTTGTGAAAGCGCACGGCAAGAGGCGAGGGGCGGCGACTGG<br/> TGAGTACGCCAAAAATTTGACTAGCGGAGGCTAGAAGGAGAGAGATGGGTGCGAG<br/> AGCGTCAGTATTAAGCGGGGAGAATTAGATCGCGATGGGAAAAAATTCGGTTAAG<br/> GCCAGGGGAAAGAAAAATATAAATTAACAATATAGTATGGGCAAGCAGGGAGC<br/> TAGAACGATTTCGAGTTAATCTGGCTGTTAGAACATCAGAAGGCTGTAGACAA<br/> ATACTGGGACAGCTACAACCATCCCTTCAGACAGGATCAGAGAAGCTTAGATCATT<br/> ATATAATACAGTAGCAACCCCTCTATTGTGTGCATCAAAGGATAGAGATAAAAAGACA<br/> CCAAGGAAGCTTTAGACAAGATAGAGGAAGAGCAAAACAAAAGTAAGACCACCGCA<br/> CAGCAAGCGGCCGCTGATCTTCAGACTTGGAGGAGGAGATATGAGGGACAATTGGA<br/> GAAGTGAATTATATAAATATAAAGTAGTAAAAATTAAGCAATTAGGAGTAGCACCC<br/> ACCAAGGCAAGAGAAGAGTGGTGCAGAGAAAAAAGAGCAGTGGGAATAGGAGC<br/> TTTTTCTTGGGTTCTTGGGAGCAGCAGGAAGCACTATGGGCGCAGCCTCAATGA<br/> CGCTGACGGTACAGGCCAGACAATTATTGTCTGGTATAGTGCAGCAGCAGAACAAAT<br/> TTGCTGAGGGCTATTGAGGCGCAACAGCATCTGTTGCAACTCACAGTCTGGGGCAT<br/> CAAGCAGCTCCAAGCAAGAATCCTAGCTGTGGAAAGATACCTAAAGGATCAACAGC<br/> TCCTAGGGATTGGGGTTGCTCTGGAACACTCATTGCAACACTGCTGTGCTTGG<br/> AATGCTAGTTGGAGTAATAAATCTCTGGAACAGATCTGGAATCACACGACCTGGAT<br/> GGAGTGGGACAGAGAAATTAACAATTACACAAGCTTAATACACTCCTTAATTGAAG<br/> AATCGCAAAACCAGCAAGAAAAGAAATGAACAAGAAATATTGGAATTAGATAAATGG<br/> GCAAGTTTGTGGAATTGGTTAACATAACAATTTGGCTGTGGTATATAAATAATT<br/> CATAATGATAGTAGGAGGCTTGGTAGGTTTAAAGAAATGTTTTTGTGCTACTTTCTA<br/> TAGTGAATAGAGTTAGGCAGGATATTACCAATTATCGTTTCAGACCCACCTCCCA<br/> ATCCCGAGGGGACCCGACAGGCCGAAGGAATAGAAGAAGAGGTGGAGAGAGAGA<br/> CAGAGACAGATCCATTGATTAGTGAACGGATCAACTTTTTAAAAGAAAAGGGGGGA<br/> TTGGGGGTACAGTGCAGGGGAAAAGAAATAGTAGACATAATAGCAACAGACATACAA<br/> ACTAAAGAATTACAAAACAATTACAAAATTTCAAATTTTATCGATAAGCTTGG<br/> GAGTTCGCGTTACATAACTTACGGTAAATGGCCCGCTGGCTGACCGCCCAACGA<br/> CCCCCGCCATTGACGTCAATAATGACGTATGTTCCCATAGTAACGCCAATAGGGA<br/> CTTTCCATTGACGTCAATGGGTGGAGTATTTACGGTAAACTGCCCACTTGGCAGTA<br/> CATCAAGTGTATCATATGCCAAGTACGCCCTTATTGACGTCAATGACGGTAAATG<br/> GCCCCCTGGCATTATGCCAGTACATGACCTTATGGGACTTTTCTACTTGGCAGT<br/> ACATCTACGTATTAGTCATCGCTATTACCATGGTGTATGCGGTTTTGGCAGTACATC<br/> AATGGGCGTGGATAGCGGTTTACTCACGGGATTTCCAAGTCTCCACCCATTGA<br/> CGTCAATGGGAGTTTTGTTTTGGCACAAAATCAACGGGACTTTCCAAAATGTCGTA<br/> ACAACCTCCGCCCATTTGACGCAAAATGGGCGGTAGGCGTGTACGGTGGGAGGCTAT<br/> ATAAGCAGAGCTCGTTTAGTGAACCGTCAGATCGCCTGGAGACCCATCCACGCTG<br/> TTTTGACCTCCATAGAAGACACCGACTGAGCTCCTTAAGGTTGCCACCATGGGATC<br/> CCTCGAGGGTGGTGGTTCCGGTGTAGCAGAAGCTGATCTCAGAGGAGGACCTGTGAT<br/> CGAGCCATGGAAGCTTGATATCTAAGTACTGACTGAACCGGTGGTACCAGGAATTAAT<br/> TCGCTGTCTGCGAGGGCCAGCTGTTGGGTTGAGTACTCCCTCTCAAAGCGGGCAT<br/> GACTTCTGCGCTAAGATTGTCAGTTTCCAAAACGAGGAGGATTTGATATTACCT<br/> GGCCCGGCTGATGCCTTTGAGGGTGGCCGCTCCATCTGGTCAGAAAAGACAATC<br/> TTTTTGTGTCAAGCTTGGAGTGTGGCAGGCTTGAGATCTGGCCATACACTTGAGT<br/> GACAATGACATCCACTTTGCCTTTCTCTCCACAGGTGTCCACTCCAGGTCCAAT<br/> GCAGGTCGAGCATGCACTAGGGCGGCCAATTCGCGCATCTGGAAAAACATGGA<br/> GCAATCACAGTAGCAATACAGCAGCTACCAATGCTGATTGTGCCTGGCTAGAAGC<br/> ACAAGAGGAGGAGGAGGTGGGTTTTCCAGTACACCTCAGACAATCAACCTCTGGA<br/> TTACAAAATTTGTGAAAGATTGACTGGTATTCTTAACATATGTTGCTCCTTTTACGC<br/> TATGTGATACGCTGCTTTAATGCCTTTGTATCATGCTATTGCTTCCCGTATGGCT<br/> TTCATTTTCTCCTCTGTATAAATCCTGGTTGCTGTCTCTTTATGAGGAGTTGTG<br/> GCCCCGTGTGACGGCAACGTGGCGTGGTGTGCACTGTGTTTGTGACGCAACCCCCA<br/> CTGGTTGGGGCATTGCCACCACCTGTGAGTCTCTTCCGGGACTTTTCGCTTTCCCC<br/> CTCCCTATTGCCACGGCGGAACTCATCGCCCGCTGCTTCCCGCTGCTGGACAGG<br/> GGCTCGGCTGTTGGGCACTGACAATCCGTTGGTGTGTCGGGGAAGCTGACGTCTC<br/> TTCCATGGCTGCTCGCTGTGTTGCCACCTGGATTCTGCGCGGGACGCTCCTTCTGC</p> |  |
|--|--------------------------------------------------------------------------------------------------------------------------------------------------------------------------------------------------------------------------------------------------------------------------------------------------------------------------------------------------------------------------------------------------------------------------------------------------------------------------------------------------------------------------------------------------------------------------------------------------------------------------------------------------------------------------------------------------------------------------------------------------------------------------------------------------------------------------------------------------------------------------------------------------------------------------------------------------------------------------------------------------------------------------------------------------------------------------------------------------------------------------------------------------------------------------------------------------------------------------------------------------------------------------------------------------------------------------------------------------------------------------------------------------------------------------------------------------------------------------------------------------------------------------------------------------------------------------------------------------------------------------------------------------------------------------------------------------------------------------------------------------------------------------------------------------------------------------------------------------------------------------------------------------------------------------------------------------------------------------------------------------------------------------------------------------------------------------------------------------------------------------------------------------------------------------------------------------------------------------------------------------------------------------------------------------------------------------------------------------------------------------------------------------------------------------------------------------------------------------------------------------------------------------------------------------------------------------------------------------------------------------------------------------------------------------------------------------------------------------------------------------------------------------------------------------------------------------------------------------------------------------------------------------------------------------------------------------------------------------------------------------------------------------------------------------------------------------------------------------------------------------------------------------------------------------------------------------------------------------------------------------------------------------------------------------------------------------------------------------------------------------------------------------------------------------------------------------------------------------------------------------------------------------------------------------------------------------------------------------------------------------------------------------------------------------------------------------------------------------------------------------------------------------------------------------------------------------------------------------------------------------------------------------------------------------------------------------------------------------------------------------------------------------------------------------------------------------------------------------------------------------------------------------------------------------------------------------------------------------------------------------------------------------------------------------------------------------------------------------------------------------------------------------------------------------------------------------------------------------------------------------------------------------------------|--|

|  |                                                                                                                                                                                                                                                                                                                                                                                                                                                                                                                                                                                                                                                                                                                                                                                                                                                                                                                                                                                                                                                                                                                                                                                                                                                                                                                                                                                                                                                                                                                                                                                                                                                                                                                                                                                                                                                                                                                                                                                                                                                                                                                                                                                                                                                                                                                                                                                                                                                                                                                                                                                                                                                                                                                                                                                                                                                                                                                                                                                                                                                                                                                                                                                                                                                                                                                                                                                                                                                                                                                                                                                                                                                                                                                                                                                                                                                                                                                                                                                                                                                                                                                                                                                                                                                                                                                                                                                                                                                                                                  |  |
|--|--------------------------------------------------------------------------------------------------------------------------------------------------------------------------------------------------------------------------------------------------------------------------------------------------------------------------------------------------------------------------------------------------------------------------------------------------------------------------------------------------------------------------------------------------------------------------------------------------------------------------------------------------------------------------------------------------------------------------------------------------------------------------------------------------------------------------------------------------------------------------------------------------------------------------------------------------------------------------------------------------------------------------------------------------------------------------------------------------------------------------------------------------------------------------------------------------------------------------------------------------------------------------------------------------------------------------------------------------------------------------------------------------------------------------------------------------------------------------------------------------------------------------------------------------------------------------------------------------------------------------------------------------------------------------------------------------------------------------------------------------------------------------------------------------------------------------------------------------------------------------------------------------------------------------------------------------------------------------------------------------------------------------------------------------------------------------------------------------------------------------------------------------------------------------------------------------------------------------------------------------------------------------------------------------------------------------------------------------------------------------------------------------------------------------------------------------------------------------------------------------------------------------------------------------------------------------------------------------------------------------------------------------------------------------------------------------------------------------------------------------------------------------------------------------------------------------------------------------------------------------------------------------------------------------------------------------------------------------------------------------------------------------------------------------------------------------------------------------------------------------------------------------------------------------------------------------------------------------------------------------------------------------------------------------------------------------------------------------------------------------------------------------------------------------------------------------------------------------------------------------------------------------------------------------------------------------------------------------------------------------------------------------------------------------------------------------------------------------------------------------------------------------------------------------------------------------------------------------------------------------------------------------------------------------------------------------------------------------------------------------------------------------------------------------------------------------------------------------------------------------------------------------------------------------------------------------------------------------------------------------------------------------------------------------------------------------------------------------------------------------------------------------------------------------------------------------------------------------------------------------|--|
|  | <p>TACGTCCTTCGGCCCTCAATCCAGCGGACCTTCCTTCCCGCGGCCTGCTGCCGGC<br/> TCTGCCGCTCTTCCGCGTCTTCCGCTTCCGCTCAGACGAGTCGGATCTCCCTTT<br/> GGCCGCTCCCGCTGGAATTCGAGCTCGGTACCTTTAAGACCAATGACTTACA<br/> AGGCAGCTGTAGATCTTAGCCACTTTTTAAAAGAAAAGGGGGACTGGAAGGGCTA<br/> ATTCCTCCCAAGAAGACAAGATATCCTTGATCTGTGGATCTACCACACACAAGG<br/> CTACTTCCCTGATTGACAGAATAACACACAGGGCCAGGGGTGAGATATCCACTGA<br/> CCTTTGGATGGTGTACAAGCTAGTACCAGTTGAGCCAGATAAGATAGAAGAGGCC<br/> AATAAAGGAGAGAACCCAGCTTGTACACCTGTGAGCCTGCATGGGATGGATGA<br/> CCCGGAGAGAGAAGTGTAGAGTGGAGTTTGACAGCCGCTAGCATTTCATCAG<br/> TGGCCCGGAGAGCTGCATCCGGACTGTACTGGTCTCTCTGGTTAGACCAGATCTGA<br/> GCCTGGGAGCTCTCTGGCTAACTAGGAACCCACTGCTTAAGCCTCAATAAAGCTT<br/> GCCTTGAGTGTCAAGTAGTGTGTGCCCGTCTGTTGTGTGACTCTGGTAACTAGA<br/> GATCCCTCAGACCTTTTAGTCAGTGTGAAAATCTCTAGCAGGGCCGCTTTAAAC<br/> CCGCTGATCAGCCTCGACTGTGCCTTCTAGTGTCCAGCCATCTGTTGTTGCCCTT<br/> CCCCGTGCCTTCTTGACCCTGGAAGGTGCCACTCCACTGTCTTTCCTAATAA<br/> AATGAGGAAATTCATCGCATGTCTGAGTAGGTGTCATTTCTATTCTGGGGGGTGG<br/> GGTGGGGCAGGACAGCAAGGGGGAGGATTGGGAAGACAATAGCAGGCATGCTGGGG<br/> ATGCGGTGGGCTCTATGGCTTCTGAGCGGAAAGAACCAGTGGGGCTCTAGGGGG<br/> TATCCCCACGCGCCCTGTAGCGGGCATTAAAGCGGGCGGGTGTGGTGGTTACGGC<br/> CAGCGTGACCGCTACACTTGCAGCGCCCTAGCGCCGCTCCTTTTCGCTTTCTTCC<br/> CTTCTTCTCGCCACGTTCCGCGGCTTTCCCGTCAAGCTCTAAATCGGGGCATC<br/> CCTTTAGGGTTCCGATTTAGTGCTTTACGGCACCTCGACCCCAAAAACTTGATTA<br/> GGGTGATGGTTCACGTAGTGGCCATCGCCCTGATAGACGGTTTTTCGCCCTTTGA<br/> CGTTGGAGTCCACGTTCTTTAATAGTGGACTCTGTTCAAACTGGAACAACACTA<br/> AACCTATCTCGGTCTATTCTTTGATTTATAAGGGATTTTGGGGATTTCCGGCTA<br/> TTGGTTAAAAATGAGCTGATTTAAACAAAAATTTAACGCGAATTAATTTCTGTGAA<br/> TGTGTGTGAGTTAGGGTGTGAAAGTCCCCAGGCTCCCCAGGCAGGCAGAAGTATG<br/> CAAAGCATGCATCTCAATTAGTCAGCAACCAGGTGTGAAAGTCCCCAGGCTCCCC<br/> AGCAGGCAGAAGTATGCAAAGCATGCATCTCAATTAGTCAGCAACCATAGTCCCGC<br/> CCCTAACTCCGCCATCCCGCCCTAACTCCGCCAGTTCGCCCATTTCTCCGCC<br/> CATGGCTGACTAATTTTTTTTATTTATGACAGGGCCGAGGCGCCCTCTGCCTCTGA<br/> GCTATTCAGAAAGTAGTGGAGGCTTTTTTGGAGGCTTAGGCTTTTGCAAAAAGC<br/> TCCCGGGAGCTTGTATATCCATTTTCGGATCTGATCAGCACGTGTTGACAATTAAT<br/> CATCGGCATAGTATATCGGCATAGTATAATACGACAAGGTGAGGAACTAAACCATG<br/> GCCAAGTTGACCAGTGCCGTTCCGGTGTCTACCGCGCGGACGTCGCCGGAGCGGT<br/> CGATTTCTGGACCGACCGGCTCGGGTCTCCCGGACTTCTGGAGGACGACTCTCG<br/> CCGGTGTGGTCCGGGACGACGTGACCTGTTTCATCAGCGCGGTCCAGGACCAGGTG<br/> GTGCCGGACAACACCTTGGCTGGGTGTGGGTGCGCGGCCCTGGACGAGCTGTACGC<br/> CGAGTGGTCCGGAGTGTGTCCACAACTTCCGGGACGCCTCCGGGCGGGCCATGA<br/> CCGAGATCCGGCAGCAGCCGTGGGGCGGGAGTTCCGCTTGCAGCAGCCCGCGGC<br/> AACTGCGTGCCTTCTGGCCGAGGAGCAGGACTGACACGTGCTACGAGATTTTCA<br/> TTCCACCGCCGCTTCTATGAAAGGTGGGCTTCGGAATCGTTTTCCGGGACGCCG<br/> GCTGGATGATCTCCAGCGCGGGATCTCATGCTGGAGTTCTTCCGCCACCCCAAC<br/> TTGTTTTATTGAGCTTATAATGGTTACAAAATAAAGCAATAGCATCACAAAATTCAC<br/> AAATAAAGCATTTTTTCTACTGCATTTCTAGTTGTGGTTTGTCCAACTCATCAATG<br/> TATCTTATCATGTCTGTATACCGTCGACCTTAGCTAGAGCTTGGCGTAATCATGG<br/> TCATAGCTGTTTCTGTGTGAAATTTGTTATCCGCTCACAATTCACACAACATACG<br/> AGCCGGAAGCATAAAGTGTAAAGCCTGGGGTGCCTAATGAGTGAAGTAACTACAT<br/> TAATTTGCGTTGCGCTACTGCCCCGCTTCCAGTCCGGGAAACCTGTGTGCCAGCTG<br/> CATTAAATGAATCGGCCAACGCGCGGGGAGAGGCGGTTTGCATTTGGGCGCTCTTC<br/> CGTTTCTCGCTCACTGACTCGCTGCGCTCGGCTCGGCTGCGGCGAGGCGGTAT<br/> CAGCTCACTCAAAGGCGGTAATACGTTTATCCACAGAATCAGGGGATAACGCAGGA<br/> AAGAACATGTGAGCAAAAGGCCAGCAAAAGGCCAGGAACCGTAAAAAGGCCGCTT<br/> GCTGGCGTTTTTCCATAGGCTCCGCCCCCTGACGAGCATCACAAAATCGACGCT<br/> CAAGTCAGAGGTGGCGAAACCCGACAGGACTATAAAGATACCAGGCGTTTTCCCTT<br/> GGAAGCTCCCTCGTGCCTCTCCTGTTCCGACCCTGCCGCTTACCGGATACCTGTC<br/> CGCTTTCTCCCTTCCGGAAGCGTGGCGCTTCTCAATGCTCACGCTGTAGGTATC<br/> TCAGTTCCGGTGTAGGTCGTTCCGCTCCAAGCTGGGCTGTGTGCACGAACCCCGCTT<br/> CAGCCCGACCGCTGCGCTTATCCGGTAACTATCGTCTTGAATCCACCCGTAAG<br/> ACAGACTTATCGCCACTGGCAGCAGCCACTGGTAACAGGATTAGCAGAGCGAGGT<br/> ATGTAGCGGGTGTACAGAGTCTTGAAGTGGTGGCCTAACTACGGCTACACTAGA<br/> AGGACAGTATTTGGTATCTGCGCTCTGCTGAAGCCAGTTACCTTCGGA AAAAGAGT<br/> TGGTAGCTCTTGTATCCGGCAACAAACCACCGCTGGTAGCGGTGGTTTTTTTGT<br/> GCAAGCAGCAGATTACGCGCAGAAAAAAGGATCTCAAGAAGATCCTTTGATCTTT<br/> TCTACGGGGTCTGACGCTCAGTGGAAACGAAAACCTACGTTAAGGGATTTTGGTCAT<br/> GAGATTATCAAAAAGGATCTTACCTAGATCTTTTAAATTA AAAATGAAGTTTTTA<br/> AATCAATCTAAAGTATATATGAGTAACTTGGTCTGACAGTTACCAATGCTTAATC<br/> AGTGAGGCACCTATCTCAGCGATCTGTCTATTTTCGTTTCAATCATAGTTGCCTGACT<br/> CCCCGTCGTGTAGATAACTACGATACGGGAGGGCTTACCATCTGGCCCCAGTGTG<br/> CAATGATACCGCGAGACCCACGCTCACCGGCTCCAGATTTATCAGCAATAAACCAG<br/> CCAGCCGGAAGGGCCGAGCGCAGAAGTGGTCTGCAACTTTATCCGCTCCATCCA</p> |  |
|--|--------------------------------------------------------------------------------------------------------------------------------------------------------------------------------------------------------------------------------------------------------------------------------------------------------------------------------------------------------------------------------------------------------------------------------------------------------------------------------------------------------------------------------------------------------------------------------------------------------------------------------------------------------------------------------------------------------------------------------------------------------------------------------------------------------------------------------------------------------------------------------------------------------------------------------------------------------------------------------------------------------------------------------------------------------------------------------------------------------------------------------------------------------------------------------------------------------------------------------------------------------------------------------------------------------------------------------------------------------------------------------------------------------------------------------------------------------------------------------------------------------------------------------------------------------------------------------------------------------------------------------------------------------------------------------------------------------------------------------------------------------------------------------------------------------------------------------------------------------------------------------------------------------------------------------------------------------------------------------------------------------------------------------------------------------------------------------------------------------------------------------------------------------------------------------------------------------------------------------------------------------------------------------------------------------------------------------------------------------------------------------------------------------------------------------------------------------------------------------------------------------------------------------------------------------------------------------------------------------------------------------------------------------------------------------------------------------------------------------------------------------------------------------------------------------------------------------------------------------------------------------------------------------------------------------------------------------------------------------------------------------------------------------------------------------------------------------------------------------------------------------------------------------------------------------------------------------------------------------------------------------------------------------------------------------------------------------------------------------------------------------------------------------------------------------------------------------------------------------------------------------------------------------------------------------------------------------------------------------------------------------------------------------------------------------------------------------------------------------------------------------------------------------------------------------------------------------------------------------------------------------------------------------------------------------------------------------------------------------------------------------------------------------------------------------------------------------------------------------------------------------------------------------------------------------------------------------------------------------------------------------------------------------------------------------------------------------------------------------------------------------------------------------------------------------------------------------------------------------------------------|--|

|  |                         |                                                                                                                                                                                                                                                                                                                                                                                                                                                                                                                                                                                                                                                                                                                                                                                                                                                                                                                                                                                                                                                                                                                                                                                                                                                                                                                                                                                                                                                                                                                                                                                                                                                                                                                                                                                                                                                                                                                                                                                                                                                                                                                                                                                                                                                                                                                                                                                                                                                                                                                                                                                                                                                                                                                                                                                                                                                                                                                                                                                                                                                                                                                                                                                                                                                                                                                                                                                                                                                                                                                                                                                                                    |  |
|--|-------------------------|--------------------------------------------------------------------------------------------------------------------------------------------------------------------------------------------------------------------------------------------------------------------------------------------------------------------------------------------------------------------------------------------------------------------------------------------------------------------------------------------------------------------------------------------------------------------------------------------------------------------------------------------------------------------------------------------------------------------------------------------------------------------------------------------------------------------------------------------------------------------------------------------------------------------------------------------------------------------------------------------------------------------------------------------------------------------------------------------------------------------------------------------------------------------------------------------------------------------------------------------------------------------------------------------------------------------------------------------------------------------------------------------------------------------------------------------------------------------------------------------------------------------------------------------------------------------------------------------------------------------------------------------------------------------------------------------------------------------------------------------------------------------------------------------------------------------------------------------------------------------------------------------------------------------------------------------------------------------------------------------------------------------------------------------------------------------------------------------------------------------------------------------------------------------------------------------------------------------------------------------------------------------------------------------------------------------------------------------------------------------------------------------------------------------------------------------------------------------------------------------------------------------------------------------------------------------------------------------------------------------------------------------------------------------------------------------------------------------------------------------------------------------------------------------------------------------------------------------------------------------------------------------------------------------------------------------------------------------------------------------------------------------------------------------------------------------------------------------------------------------------------------------------------------------------------------------------------------------------------------------------------------------------------------------------------------------------------------------------------------------------------------------------------------------------------------------------------------------------------------------------------------------------------------------------------------------------------------------------------------------|--|
|  |                         | <p>GTCTATTAATTGTTGCCGGGAGCTAGAGTAAGTAGTTTCGCCAGTTAATAGTTTGC<br/> GCAACGTTGTTGCCATTGCTACAGGCATCGTGGTGTCAAGCTCGTCTGTTGGTATG<br/> GCTTCATTCAGCTCCGGTTCCCAACGATCAAGGCGAGTTACATGATCCCCATGTT<br/> GTGCAAAAAGCGGTTAGCTCCTTCGGTCCCGATCGTTGTCAGAAAGTAAGTTGG<br/> CCGCAGTGTATCACTCATGGTTATGGCAGCACTGCATAATCTCTTACTGTCATG<br/> CCATCCGTAAGATGCTTTTCTGTGACTGGTGTGACTCAACCAAGTCATTCTGAGA<br/> ATAGTGTATGCGGCGACCGAGTTGCTCTTGCCCGGCGTCAATACGGGATAATACCG<br/> CGCCACATAGCAGAACTTTAAAAGTGTCTATCATTGGAAAACGTTCTTCGGGGCGA<br/> AAACTCTCAAGGATCTTACCCTGTTGAGATCCAGTTCGATGTAACCCACTCGTGC<br/> ACCCAACTGATCTTACGATCTTTTACTTTACCAGCGTTTCTGGGTGAGCAAAAA<br/> CAGGAAGGCAAAATGCCGCAAAAAGGGAATAAGGGCGACACGGAAATGTTGAATA<br/> CTCATACTCTTCTTTTCAATATTTGAAGCATTATCAGGGTTATTGTCTCAT<br/> GAGCGGATACATATTTGAATGTATTTAGAAAAATAAACAAATAGGGGTTCCGCGCA<br/> CATTTCCCCGAAAAGTGCCACTGACGTC</p>                                                                                                                                                                                                                                                                                                                                                                                                                                                                                                                                                                                                                                                                                                                                                                                                                                                                                                                                                                                                                                                                                                                                                                                                                                                                                                                                                                                                                                                                                                                                                                                                                                                                                                                                                                                                                                                                                                                                                                                                                                                                                                                                                                                                                                                                                                                                                                                                                                                                                                                                                                                                                                                                                                                                                         |  |
|  | <p>pLGS<br/> vector</p> | <p>AGATCTCGATCCCGCGAAATTAATACGACTCACTATAGGGGAATTGTGAGCGGATA<br/> ACAATCCCCCTAGAAATAATTTTTGTTAACTTTAAGAAGGAGATATACATATGG<br/> GCTCGAGCGCGGATCCGACAAAGACTGCGAAATGAAGCGCACCCCTGGATAGC<br/> CCTCTGGGCAAGCTGGAAGTGTCTGGGTGCGAACAGGGCCTGCACCGTATCATCTT<br/> CCTGGGCAAAGAACATCTGCCCGCAGCCGTGGAAGTGCCTGCCCCAGCCGCCG<br/> TGCTGGGCGGACAGAGCCACTGATGCAGGCCACCGCTGGCTCAACGCCCTACTTT<br/> CACCAGCCTGAGGCCATCGAGGAGTTCCTGTGCCAGCCCTGCACCACCCAGTGT<br/> CCAGCAGGAGAGCTTTACCCGCCAGGTGCTGTGAAACTGCTGAAAGTGGTGAAGT<br/> TCGGAGAGGTGATCAGTACAGCCACTGGCCGCCCTGGCCGGCAATFCCCGCCGC<br/> ACCGCCGCCGTGAAAACCGCCCTGAGCGGAAATCCCGTGCCATTCTGATCCCCTG<br/> CCACCGGGTGGTGCAGGGCGACCTGGACGTGGGGGGTACGAGGGCGGGCTCGCCG<br/> TGAAAGAGTGGTGTGGCCACGAGGGCCACAGACTGGGCAAGCCTGGGTGGGT<br/> CCGGGAGGCCAAAGCTTATCCACCCCGCCGACCCCGAGCACTCTCTTACCGGTCT<br/> GAACGACATCTTCGAGGCTCAGAAAATCGAATGGCAGCAACTCGAGCACCACC<br/> ACCACCACTGAGATCCGGCTGCTAACAAAGCCGAAAGGAAGCTGAGTTGGTGTCT<br/> GCCACCGCTGAGCAATAACTAGCATAACCCCTTGGGGCCTTAAACGGGTCTTGG<br/> GGTTTTTTGCTGAAAGGAGGAATATATCCGGATTGGCGAATGGGACGCGCCCTG<br/> TAGCGGCGCATTAAGCGCGCGGGTGTGGTGGTTACGCGCAGCGTACCCGCTACAC<br/> TTGCCAGCGCCCTAGCGCCCGCTCCTTTCGCTTCTTCCCTTCTTCTCGCCACG<br/> TTCGCCGGCTTTCGCCGTCAAGCTCTAAATCGGGGGCTCCCTTAGGGTTCCGATT<br/> TAGTGCTTACGGCACCTCGACCCCAAAAACCTTGATTAGGGTGTGGTTACAGTA<br/> GTGGCCATCGCCCTGATAGACGGTTTTTCGCCCTTGACGTTGGAGTCCAGCTTC<br/> TTTAATAGTGGACTCTTGTTCAAAACCTGGAACAACACTCAACCCATCTCTCGGTCTA<br/> TCTTTTGTATTATAAGGGATTTTGCCTGATTTCGGCTATTGGTTAAAAAATGAGC<br/> TGATTTAAACAAAATTTAACCGCAATTTTAAACAAAATATTAACGTTTACAATTTCA<br/> GGTGGCACTTTTCGGGAAATGTGCGCGGAACCCCTATTTGTTATTTTTCTAAAT<br/> ACATTCAAATATGTATCCGCTCATGAATTAATCTTAGAAAAACTCATCGAGCATC<br/> AAATGAAACTGCAATTTATTCATATCAGGATTATCAATACCATATTTTTGAAAAG<br/> CCGTTTTCTGTAATGAAGGAGAAAACCTACCGAGGCAGTTCATAGGATGGCAAGAT<br/> CCTGGTATCGGTCTGCGATTCCGACTCGTCCAACATCAATACAACCTATTAATTTT<br/> CCCTCGTCAAAAATAAGGTTATCAAGTGAGAAAATCACCATGAGTGACGATGAATC<br/> CGGTGAGAATGGCAAAAGTTTATGCATTTCTTCCAGACTTGTTCACAGGCCAGC<br/> CATTACGCTCGTCATCAAAATCACTCGCATCAACCAACCCGTTATTCATTCTGTAT<br/> TGCCCTGAGCGAGACGAAATACCGCATCGCTGTTAAAAGGACAATTACAACAGG<br/> AATCGAATGCAACCGCGCAGGAACACTGCGAGCGCATCAACAATATTTTTACCTG<br/> AATCAGGATATTTCTTAATACCTGGAATGCTGTTTTCCCGGGATCGCAGTGGTG<br/> AGTAACCATGCATCATCAGGAGTACGATAAAATGCTTGATGGTTCGGAAGAGGCAT<br/> AAATCCGTCAGCCAGTTTAGTCTGACCATCTCATCTGTAACATCATTTGGCAACGC<br/> TACCTTTGCCATGTTTCAGAAACAACCTTGCGGCATCGGGCTTCCCATACAATCGA<br/> TAGATTGTCGCACCTGATTGCCCGACATTATCGCGAGCCATTTATACCCATATAA<br/> ATCAGCATCCATGTTGGAATTTAATCGCGGCTAGAGCAAGACGTTTCCCGTTGAA<br/> TATGGCTCATAACACCCCTTGATTTACTGTTTATGTAAGCAGACAGTTTTATGTT<br/> CATGACCAAAATCCCTTAACGTGAGTTTTCGTTCACCTGAGCGTCAGACCCGATG<br/> AAAAGATCAAAGGATCTTCTTGTGATCCTTTTTTTCTGCGGTAATCTGCTGCTTG<br/> CAAACAAAAAACCCCGCTACCAGCGGTGGTTTTGTTGCGGATCAAGAGCTACC<br/> AACTCTTTTTCCGAAGGTAACCTGGCTTCAGCAGAGCGCAGATACCAAACTACTGTCC<br/> TTCTAGTGTAGCCGTAGTTAGGCCACCCTTCAAGAACTCTGTAGCACCAGCTACA<br/> TACCTCGCTCTGCTAATCCTGTTACCAGTGGTGTGCCAGTGGCGATAAGTCTGTG<br/> TCTTACCGGGTTGGACTCAAGACGATAGTTACCGGATAAGGCGCAGCGGTGGGGT<br/> GAACGGGGGTTCTGTGCACACAGCCAGCTTGGAGCGAACGACCTACACCGAACTG<br/> AGATACTACAGCGTGTGATATGAGAAAAGCGCCACGCTTCCCGAAGGGAGAAAAGG<br/> GGACAGGTATCCGGTAAGCGGCAGGGTCGGAACAGGAGAGCGCACGAGGGAGCTTC<br/> CAGGGGAAAACCGCTGGTATCTTTATAGTCTGTGCGGTTTTGCCACCTCTGACTT<br/> GAGCGTCGATTTTTGTGATGCTCGTCAGGGGGCGGAGCCTATGGAAAACCGCCAG<br/> CAACCGGCCCTTTTTACGGTTCTTGCCCTTTTGTGTCCTTTTGTCTCACATGTTCT<br/> TTCTGCGTTATCCCTGATTTCTGTGGATAACCGTATTACCCTTTTGTGAGTGTGCT<br/> GATACCCTCGCCGACGCCAACGACCGAGCGCAGCGAGTCAGTGAGCGAGGAAGC</p> |  |

|  |                                                                                                                                                                                                                                                                                                                                                                                                                                                                                                                                                                                                                                                                                                                                                                                                                                                                                                                                                                                                                                                                                                                                                                                                                                                                                                                                                                                                                                                                                                                                                                                                                                                                                                                                                                                                                                                                                                                                                                                                                                                                                                                                                                                                                                                                                                                                                                                                                                                                                                                                                                                                                                                                                                                                                                                                                                                                                                                                                                                                                                         |  |
|--|-----------------------------------------------------------------------------------------------------------------------------------------------------------------------------------------------------------------------------------------------------------------------------------------------------------------------------------------------------------------------------------------------------------------------------------------------------------------------------------------------------------------------------------------------------------------------------------------------------------------------------------------------------------------------------------------------------------------------------------------------------------------------------------------------------------------------------------------------------------------------------------------------------------------------------------------------------------------------------------------------------------------------------------------------------------------------------------------------------------------------------------------------------------------------------------------------------------------------------------------------------------------------------------------------------------------------------------------------------------------------------------------------------------------------------------------------------------------------------------------------------------------------------------------------------------------------------------------------------------------------------------------------------------------------------------------------------------------------------------------------------------------------------------------------------------------------------------------------------------------------------------------------------------------------------------------------------------------------------------------------------------------------------------------------------------------------------------------------------------------------------------------------------------------------------------------------------------------------------------------------------------------------------------------------------------------------------------------------------------------------------------------------------------------------------------------------------------------------------------------------------------------------------------------------------------------------------------------------------------------------------------------------------------------------------------------------------------------------------------------------------------------------------------------------------------------------------------------------------------------------------------------------------------------------------------------------------------------------------------------------------------------------------------------|--|
|  | <p>GGAAGAGCGCCTGATGCGGTATTTTCTCCTTACGCATCTGTGCGGTATTTACACC<br/>GCATATATGGTGCACCTCTCAGTACAATCTGTCTGTATGCCGCATAGTTAAGCCAGT<br/>ATACACTCCGCTATCGCTACGTGACTGGGTCATGGCTGCGCCCCGACACCCGCCAA<br/>CACCCGCTGACGCGCCCTGACGGGCTTGTCTGCTCCCGGCATCCGCTTACAGACAA<br/>GCTGTGACCGTCTCCGGGAGCTGCATGTGTGACAGGTTTTACCCGTCATCACCAGAA<br/>ACGCGCGAGGCGAGCTGCGGTAAAGCTCATCAGCGTGGTCGTGAAGCGATTACAGAA<br/>TGTCTGCCTGTTTATCCGCTCCAGCTCGTTGAGTTTCTCCAGAAGCGTTAATGTC<br/>TGGCTTCTGATAAAGCGGGCCATGTTAAGGGCGGTTTTTCTCCTGTTTGGTCACTGA<br/>TGCCTCCGTGTAAGGGGGATTTCTGTTTATGGGGTAATGATACCGATGAAACGAG<br/>AGAGGATGCTCACGATACGGGTTACTGATGATGAACATGCCCGGTTACTGGAACGT<br/>TGTGAGGGTAAACAACCTGGCGGTATGGATGCGGCGGGACCAGAGAAAAATCACTCA<br/>GGGTCAATGCCAGCGCTTCCGTTAATACAGATGTAGGTGTTCCACAGGGTAGCCAGC<br/>AGCATCTGCGATGCAGATCCGGAACATAATGGTGCAGGGCGCTGACTTCCGCGTT<br/>TCCAGACTTTACGAAACACGGAAACCGAAGACCATTTCATGTTGTTGCTCAGGTCCG<br/>AGACGTTTTGCAGCAGCAGTCGCTTACGTTTCGCTCGCGTATCGGTGATTCACTTCT<br/>GCTAACCAAGTAAGGCAACCCCGCCAGCCTAGCCGGGTCCTCAACGACAGGAGCAG<br/>ATCATGCGCACCCGTGGGGCCGATGCCGGCGATAATGGCCTGCTTCTCGCCGAA<br/>ACGTTTTGGTGGCGGGACAGTGACGAAGGCTTGAGCGAGGGCGTGAAGATTCCGA<br/>ATACCGCAAGCGACAGGCCGATCATCGTCGCGCTCCAGCGAAAGCGGTCCCTCGCCG<br/>AAAAATGCCAGAGCCTGCCGGCACCTGTCTACGAGTTGCATGATAAAGAAAGAC<br/>AGTCATAAGTGCGGGACGATAGTCATGCCCGCGCCACCAGGAGGAGCTGACTG<br/>GGTTGAAGGCTCTCAAGGGCATCGGTGAGATCCCGGTGCCATAATGAGTGAGCTAA<br/>CTTACATTAATTGCGTTGCGCTCACTGCCCGCTTCCAGTCGGGAAACCTGTCGTG<br/>CCAGCTGCATTAATGAATCGGCCAACGCGCGGGGAGAGGCGGTTTTGCGTATTGGGC<br/>GCCAGGGTGGTTTTTCTTTTACCAGTGAGACGGGCAACAGCTGATTGCCCTTAC<br/>CGCCTGGCCCTGAGAGAGTTGCAGCAAGCGGTCCACGCTGGTTTGCCCCAGCAGGC<br/>GAAAATCCTGTTGATGGTGGTTAACGGCGGGATATAACATGAGCTGTCTTCGGTA<br/>TCGTCGTATCCCACTACCGAGATATCCGCACCAACGCGCAGCCCGACTCGGTAAT<br/>GGCGCGCATGCGCCCAGGCCATCTGATCGTTGGCAACCAGCATCGCAGTGGGAA<br/>CGATGCCCTCATTCAGCATTTCATGGTTTGTGAAAACCGGACATGGCACTCCAG<br/>TCGCCTTCCCGTTCGCTATCGGCTGAATTTGATTGCGAGTGAGATATTTATGCCA<br/>GCCAGCCAGACGACGCGCCGAGACAGAACTAATGGGCCCGCTAACAGCGCGA<br/>TTTGCTGGTGACCCAATGCGACCAGATGCTCCACGCCAGTCGCGTACCGTCTTCA<br/>TGGGAGAAAATAATACTGTTGATGGGTGCTGGTTCAGAGACATCAAGAAAATAACGC<br/>CGGAACATTAGTGACGGCAGCTTCCACAGCAATGGCATCCTGGTCATCCAGCGGAT<br/>AGTTAATGATCAGCCACTGACGCGTTGCGCGAGAAGATTGTGCACCGCCGCTTTA<br/>CAGGCTTCGACGCGCTTTCGTTCTACCATCGACACCACCAGCTGGCACCCAGTTG<br/>ATCGGCGCGAGATTTAATCGCCGCGACAATTTGCGACGGCGCGTGCAGGGCCAGAC<br/>TGGAGGTGGCAACGCCAATCAGCAACGACTGTTTGCCCGCCAGTTGTTGTGCCACG<br/>CGGTTGGGAATGTAATTCAGCTCCGCCATCGCCGCTTCCACTTTTTCCCGGTTTT<br/>CGCAGAAACGTGGCTGGCTGGTTACCACGCGGGAAACGGTCTGATAAGAGACAC<br/>CGGCATACTCTGCGACATCGTATAACGTTACTGGTTTACATTCACCACCCTGAAT<br/>TGACTCTCTTCCGGGCGCTATCATGCCATACCGCGAAAGGTTTTGCGCCATTTCGAT<br/>GGTGTCCGGGATCTCGACGCTCTCCCTTATGCGACTCCTGCATTAGGAAGCAGCCC<br/>AGTAGTAGGTTGAGGCGTTGAGCACCGCCCGCAAGGAATGGTGCATGCAAGGA<br/>GATGGGCCCCAACAGTCCCCCGGCCACGGGGCTGCCACCATACCCACGCCGAAAC<br/>AAGCGCTCATGAGCCCCAAGTGGCGAGCCCGATCTCCCCATCGGTGATGTCGGCG<br/>ATATAGCGCCAGCAACCCACCTGTGGCGCCGGTATGCCGGCCACGATGCGTCC<br/>GGCTAGAGGATCG</p> |  |
|--|-----------------------------------------------------------------------------------------------------------------------------------------------------------------------------------------------------------------------------------------------------------------------------------------------------------------------------------------------------------------------------------------------------------------------------------------------------------------------------------------------------------------------------------------------------------------------------------------------------------------------------------------------------------------------------------------------------------------------------------------------------------------------------------------------------------------------------------------------------------------------------------------------------------------------------------------------------------------------------------------------------------------------------------------------------------------------------------------------------------------------------------------------------------------------------------------------------------------------------------------------------------------------------------------------------------------------------------------------------------------------------------------------------------------------------------------------------------------------------------------------------------------------------------------------------------------------------------------------------------------------------------------------------------------------------------------------------------------------------------------------------------------------------------------------------------------------------------------------------------------------------------------------------------------------------------------------------------------------------------------------------------------------------------------------------------------------------------------------------------------------------------------------------------------------------------------------------------------------------------------------------------------------------------------------------------------------------------------------------------------------------------------------------------------------------------------------------------------------------------------------------------------------------------------------------------------------------------------------------------------------------------------------------------------------------------------------------------------------------------------------------------------------------------------------------------------------------------------------------------------------------------------------------------------------------------------------------------------------------------------------------------------------------------------|--|



## SUPPLEMENTARY NOTE

### Thermodynamic modeling of competitive hetero- and homo-dimerization

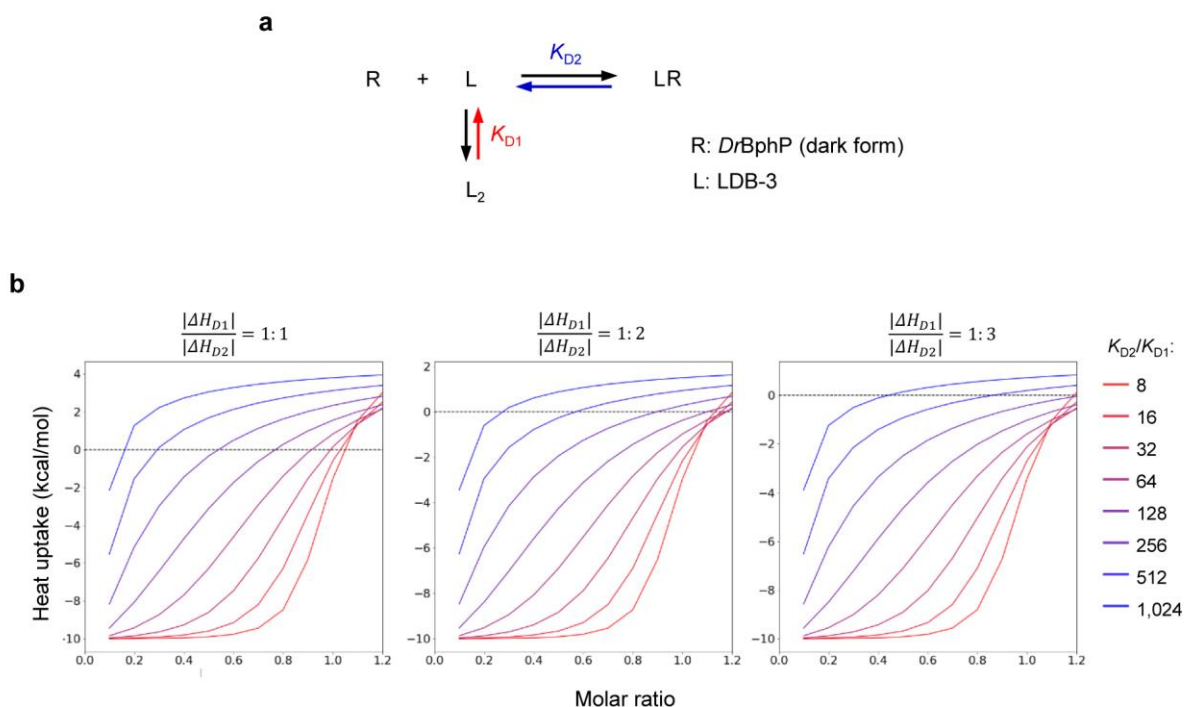

**Figure S15.** (a) Two-state equilibrium model used in the thermodynamic simulation. (b) Thermographs showing the integration of heat transfer in simulated titration experiments.

A simplified thermodynamic model was used to understand the observed transition of heat transfer from heat release to absorption when titrating LDB-3 to the dark-form *DrBphP* (Fig. 5a). We assume that the dark-form *DrBphP*–LDB-3 binding and LDB-3 dimerization are competitive (Fig. S12a):  $2L \leftrightarrow L_2$ , and  $L + R \leftrightarrow LR$ , where L represents the monomeric LDB-3 and R the dark-form *DrBphP*. The dissociation constants are  $K_{D1} = \frac{[L]^2}{[L_2]} = \frac{1}{K_{a1}}$  and  $K_{D2} = \frac{[L][R]}{[LR]} = \frac{1}{K_{a2}}$ , where [L], [L<sub>2</sub>], [R], and [LR] are equilibrium concentrations, and  $K_{a1}$  and  $K_{a2}$  are association constants. The relationships of these concentrations are  $[L_T] = [L] + [LR] + 2[L_2]$ , and  $[R_T] = [R] + [LR]$ , where [L<sub>T</sub>] represents the initial total concentration of LDB-3 and [R<sub>T</sub>] represents the initial total concentration of *DrBphP*. So, the equilibrium dissociation constants can also be expressed as  $K_{D1} = \frac{([L_T] - 2[L_2] - [LR])^2}{[L_2]}$ , and  $K_{D2} = \frac{([L_T] - 2[L_2] - [LR])([R_T] - [LR])}{[LR]}$ . [L<sub>2</sub>] and [LR] could be determined if [K<sub>D1</sub>], [K<sub>D2</sub>], [L<sub>T</sub>] and [R<sub>T</sub>] are known.

The equilibrium dissociation constant is associated with the Gibbs energy of dissociation,  $\Delta G_D$ , and can be expressed in terms of the enthalpy ( $\Delta H_D$ ) and entropy ( $\Delta S_D$ ) changes in the process:  $\Delta G_D = -RT \ln K_D = \Delta H_D - T\Delta S_D$ . During the ITC assay, we assume that the whole heat transfer is the sum of

$\Delta H_{D1}$  and  $\Delta H_{D2}$  which could be calculated by concentration changes of each component using above equations. To simulate a titration process, the dissociation of the LDB-3 homodimer was set to be *endothermic* ( $\Delta H_{D1} > 0$ ) while the formation of the LDB-3-DrBphP complex was *exothermic* ( $\Delta H_{D2} < 0$ ), which is consistent with our experimental results (Figs. 5a and S7). To calculate heat transfer of the whole system,  $K_{D2}/K_{D1}$  was set as a variable, and  $\frac{|\Delta H_{D1}|}{|\Delta H_{D2}|}$  was set to be 1:1, 1:2, or 1:3. Thermographs were generated to show the integration of heat transfer in an titration experiment. Below is the command used to run the simulation:

```
import os
import os.path
import sys
from scipy.optimize import fsolve
from matplotlib import pyplot as plt

n_point = 13 # number of drops
L2_lst = [] # the concentration of L2 after each drop
LR_lst = [] # the concentration of LR after each drop
R_lst = [] # the concentration of R after each drop
L_lst = [] # the concentration of L after each drop
for i in range(0, n_point):
    ka1 = 1e5 #ka1
    ka2 = 200 #ka2
    R0 = 1 #Rt
    if i == 0:
        L0 = R0 * 1e-6 / 10 #Lt, avoid 0 in calculation
    else:
        L0 = R0 * i / 10 # Lt
    results = solve([Eq(L2-ka1 * (L0-2*L2-LR)*(L0-2*L2-LR), 0), Eq(LR-
ka2*(R0-LR)*(L0-2*L2-LR),0)], [L2, LR]) # solve equations
    L2_lst.append(results[0][0].as_real_imag()[0])
    LR_lst.append(results[0][1].as_real_imag()[0])
    R_lst.append(R0-results[0][1].as_real_imag()[0])
    L_lst.append((L0-results[0][1].as_real_imag()[0]-
2*results[0][0].as_real_imag()[0])/2)

delta_L2_lst = [] #the change of concentration of L2 between two drops
delta_LR_lst = [] #the change of concentration of LR between two drops
delta_R_lst = [] #the change of concentration of R between two drops
delta_L_lst = [] #the change of concentration of L between two drops

for i in range(1, len(L2_lst)):
    delta_L2_lst.append(L2_lst[i]-L2_lst[i-1])
    delta_LR_lst.append(LR_lst[i]-LR_lst[i-1])
    delta_R_lst.append(R_lst[i]-R_lst[i-1])
    delta_L_lst.append(L_lst[i]-L_lst[i-1])

dLR = -100 #the heat change of L+R->LR
dL2 = 50 # the heat change of L+L->L2
x_lst = list(range(1, n_point)) #molar ratio
for i in range(len(x_lst)):
    x_lst[i] = float(x_lst[i])/10
H_lst = [] #data change
```

```

for i in range(len(delta_L2_lst)):
    H_lst.append(dLR * delta_LR_lst[i] + dL2 * delta_L2_lst[i])

# generate plots
plt.figure(figsize=(10,10))
plt.plot(x_lst, H_lst)
plt.xlabel("Molar Ratio")
plt.ylabel("Heat uptake")

```

The simulation result showed that the clear transition from the heat release to absorption was found when  $K_{D2} \gg K_{D1}$  (e.g.,  $K_{D2}/K_{D1} > 100$ ). The LDB-3 dimer is expected to a relatively weak complex because, in the SEC experiment, a large percentage of the dimer was dissociated at the low- $\mu\text{M}$  concentrations (Figure S8a). Based on our simulation and observed data (Fig. 5a), the dark-form *DrBphP*-LDB-3 complex ( $K_{D2}$ ) should be much weaker than the LDB-3 dimer ( $K_{D1}$ ), 3. It should be noted that this simplified model did not consider *DrBphP* dimerization and possible binding cooperativity in higher-order complexes. The fitting of the dark form binding data was found to be difficult due to the complexity of protein-protein interactions, so we did not calculate the  $K_D^{\text{app}}$ . Nevertheless, the ITC experimental data and the modeling supports the low dark activity of LDB-3 observed in other assays.

## REFERENCES

- (1) Takala, H.; Bjorling, A.; Berntsson, O.; Lehtivuori, H.; Niebling, S.; Hoernke, M.; Kosheleva, I.; Henning, R.; Menzel, A.; Ihalainen, J. A.; Westenhoff, S., Signal amplification and transduction in phytochrome photosensors. *Nature* **2014**, *509*, 245-248.
- (2) Kliebenstein, D. J.; Lim, J. E.; Landry, L. G.; Last, R. L., Arabidopsis UVR8 regulates ultraviolet-B signal transduction and tolerance and contains sequence similarity to human Regulator of Chromatin Condensation 1. *Plant Physiol.* **2002**, *130*, 234-243.
- (3) Wu, D.; Hu, Q.; Yan, Z.; Chen, W.; Yan, C. Y.; Huang, X.; Zhang, J.; Yang, P. Y.; Deng, H. T.; Wang, J. W.; Deng, X. W.; Shi, Y. G., Structural basis of ultraviolet-B perception by UVR8. *Nature* **2012**, *484*, 214-U96.
- (4) Chen, D.; Gibson, E. S.; Kennedy, M. J., A light-triggered protein secretion system. *J. Cell Biol.* **2013**, *201*, 631-640.
- (5) Hirose, Y.; Shimada, T.; Narikawa, R.; Katayama, M.; Ikeuchi, M., Cyanobacteriochrome CcaS is the green light receptor that induces the expression of phycobilisome linker protein. *Proc. Natl. Acad. Sci. U. S. A.* **2008**, *105*, 9528-9533.
- (6) Abe, K.; Miyake, K.; Nakamura, M.; Kojima, K.; Ferri, S.; Ikebukuro, K.; Sode, K., Engineering of a green-light inducible gene expression system in *Synechocystis* sp PCC6803. *Microb. Biotechnol.* **2014**, *7*, 177-183.
- (7) Blain-Hartung, M.; Rockwell, N. C.; Moreno, M. V.; Martin, S. S.; Gan, F.; Bryant, D. A.; Lagarias, J. C., Cyanobacteriochrome-based photoswitchable adenylyl cyclases (cPACs) for broad spectrum light regulation of cAMP levels in cells. *J. Biol. Chem.* **2018**, *293*, 8473-8483.
- (8) Song, J. Y.; Cho, H. S.; Cho, J. I.; Jeon, J. S.; Lagarias, J. C.; Park, Y. I., Near-UV cyanobacteriochrome signaling system elicits negative phototaxis in the cyanobacterium *Synechocystis* sp PCC 6803. *Proc. Natl. Acad. Sci. U. S. A.* **2011**, *108*, 10780-10785.
- (9) Ramakrishnan, P.; Tabor, J. J., Repurposing *synechocystis* PCC6803 UirS-UirR as a UV-violet/green photoreversible transcriptional regulatory tool in *E. coli*. *ACS Synth. Biol.* **2016**, *5*, 733-740.
- (10) Okajima, K.; Yoshihara, S.; Fukushima, Y.; Geng, X. X.; Katayama, M.; Higashi, S.; Watanabe, M.; Sato, S.; Tabata, S.; Shibata, Y.; Itoh, S.; Ikeuchi, M., Biochemical and functional characterization of BLUF-type flavin-binding proteins of two species of cyanobacteria. *J. Biochem.* **2005**, *137*, 741-750.
- (11) Yuan, H.; Dragnea, V.; Wu, Q.; Gardner, K. H.; Bauer, C. E., Mutational and structural studies of the PixD BLUF output signal that affects light-regulated interactions with PixE. *Biochemistry* **2011**, *50*, 6365-6375.
- (12) Masuda, S.; Nakatani, Y.; Ren, S. K.; Tanaka, M., Blue light-mediated manipulation of transcription factor activity in vivo. *ACS Chem. Biol.* **2013**, *8*, 2649-2653.
- (13) Stierl, M.; Stumpf, P.; Udvari, D.; Gueta, R.; Hagedorn, R.; Losi, A.; Gartner, W.; Petereit, L.; Efetova, M.; Schwarzel, M.; Oertner, T. G.; Nagel, G.; Hegemann, P., Light modulation of cellular cAMP by a small bacterial photoactivated adenylyl cyclase, bPAC, of the soil bacterium *Beggiatoa*. *J. Biol. Chem.* **2011**, *286*, 1181-1188.
- (14) Lindner, R.; Hartmann, E.; Tarnawski, M.; Winkler, A.; Frey, D.; Reinstein, J.; Meinhart, A.; Schlichting, I., Photoactivation mechanism of a bacterial light-regulated adenylyl cyclase. *J. Mol. Biol.* **2017**, *429*, 1336-1351.
- (15) Ryu, M. H.; Moskvina, O. V.; Siltberg-Liberles, J.; Gomelsky, M., Natural and engineered photoactivated nucleotidyl cyclases for optogenetic applications. *J. Biol. Chem.* **2010**, *285*, 41501-41508.
- (16) Salomon, M.; Christie, J. M.; Knieb, E.; Lempert, U.; Briggs, W. R., Photochemical and mutational analysis of the FMN-binding domains of the plant blue light receptor, phototropin. *Biochemistry* **2000**, *39*, 9401-9410.
- (17) Halavaty, A. S.; Moffat, K., N- and C-terminal flanking regions modulate light-induced signal transduction in the LOV2 domain of the blue light sensor phototropin 1 from *Avena sativa*. *Biochemistry* **2007**, *46*, 14001-14009.
- (18) Strickland, D.; Moffat, K.; Sosnick, T. R., Light-activated DNA binding in a designed allosteric

- protein. *Proc. Natl. Acad. Sci. U. S. A.* **2008**, *105*, 10709-10714.
- (19) Losi, A.; Polverini, E.; Quest, B.; Gartner, W., First evidence for phototropin-related blue-light receptors in prokaryotes. *Biophys. J.* **2002**, *82*, 2627-2634.
- (20) Moglich, A.; Moffat, K., Structural basis for light-dependent signaling in the dimeric LOV domain of the photosensor YtvA. *J. Mol. Biol.* **2007**, *373*, 112-126.
- (21) Moglich, A.; Ayers, R. A.; Moffat, K., Design and signaling mechanism of light-regulated histidine kinases. *J. Mol. Biol.* **2009**, *385*, 1433-1444.
- (22) Heintzen, C.; Loros, J. J.; Dunlap, J. C., The PAS protein VIVID defines a clock-associated feedback loop that represses light input, modulates gating, and regulates clock resetting. *Cell* **2001**, *104*, 453-464.
- (23) Zoltowski, B. D.; Schwerdtfeger, C.; Widom, J.; Loros, J. J.; Bilwes, A. M.; Dunlap, J. C.; Crane, B. R., Conformational switching in the fungal light sensor vivid. *Science* **2007**, *316*, 1054-1057.
- (24) Wang, X.; Chen, X. J.; Yang, Y., Spatiotemporal control of gene expression by a light-switchable transgene system. *Nat. Methods* **2012**, *9*, 266-U64.
- (25) Nelson, D. C.; Lasswell, J.; Rogg, L. E.; Cohen, M. A.; Bartel, B., FKF1, a clock-controlled gene that regulates the transition to flowering in Arabidopsis. *Cell* **2000**, *101*, 331-340.
- (26) Nakasako, M.; Zikihara, K.; Matsuoka, D.; Katsura, H.; Tokutomi, S., Structural basis of the LOV1 dimerization of Arabidopsis phototropins 1 and 2. *J. Mol. Biol.* **2008**, *381*, 718-733.
- (27) Yazawa, M.; Sadaghiani, A. M.; Hsueh, B.; Dolmetsch, R. E., Induction of protein-protein interactions in live cells using light. *Nat. Biotechnol.* **2009**, *27*, 941-U105.
- (28) Nash, A. I.; McNulty, R.; Shillito, M. E.; Swartz, T. E.; Bogomolni, R. A.; Luecke, H.; Gardner, K. H., Structural basis of photosensitivity in a bacterial light-oxygen-voltage/helix-turn-helix (LOV-HTH) DNA-binding protein. *Proc. Natl. Acad. Sci. U. S. A.* **2011**, *108*, 9449-9454.
- (29) Motta-Mena, L. B.; Reade, A.; Mallory, M. J.; Glantz, S.; Weiner, O. D.; Lynch, K. W.; Gardner, K. H., An optogenetic gene expression system with rapid activation and deactivation kinetics. *Nat. Chem. Biol.* **2014**, *10*, 196-202.
- (30) Guo, H. W.; Yang, W. Y.; Mockler, T. C.; Lin, C. T., Regulations of flowering time by Arabidopsis photoreceptors. *Science* **1998**, *279*, 1360-1363.
- (31) Kennedy, M. J.; Hughes, R. M.; Peteya, L. A.; Schwartz, J. W.; Ehlers, M. D.; Tucker, C. L., Rapid blue-light-mediated induction of protein interactions in living cells. *Nat. Methods* **2010**, *7*, 973-U48.
- (32) Zhou, X. X.; Chung, H. K.; Lam, A. J.; Lin, M. Z., Optical control of protein activity by Ffluorescent protein domains. *Science* **2012**, *338*, 810-814.
- (33) Mizuno, H.; Mal, T. K.; Walchli, M.; Kikuchi, A.; Fukano, T.; Ando, R.; Jeyakanthan, J.; Taka, J.; Shiro, Y.; Ikura, M.; Miyawaki, A., Light-dependent regulation of structural flexibility in a photochromic fluorescent protein. *Proc. Natl. Acad. Sci. U. S. A.* **2008**, *105*, 9227-9232.
- (34) Baca, M.; Borgstahl, G. E. O.; Boissinot, M.; Burke, P. M.; Williams, D. R.; Slater, K. A.; Getzoff, E. D., Complete chemical structure of photoactive yellow protein: novel thioester-linked 4-hydroxycinnamyl chromophore and photocycle chemistry. *Biochemistry* **1994**, *33*, 14369-14377.
- (35) Ali, A. M.; Reis, J. M.; Xia, Y.; Rashid, A. J.; Mercaldo, V.; Walters, B. J.; Brechun, K. E.; Borisenko, V.; Josselyn, S. A.; Karanicolas, J.; Woolley, G. A., Optogenetic inhibitor of the transcription factor CREB. *Chem. Biol.* **2015**, *22*, 1531-1539.
- (36) Scheib, U.; Stehfest, K.; Gee, C. E.; Korschen, H. G.; Fudim, R.; Oertner, T. G.; Hegemann, P., The rhodopsin-guanylyl cyclase of the aquatic fungus *Blastocladiella emersonii* enables fast optical control of cGMP signaling. *Sci. Signal.* **2015**, *8*.
- (37) Kainrath, S.; Stadler, M.; Reichhart, E.; Distel, M.; Janovjak, H., Green-light-induced inactivation of receptor signaling using cobalamin-binding domains. *Angew. Chem. Int. Ed. Engl.* **2017**, *56*, 4608-4611.
- (38) Kaberniuk, A. A.; Shemetov, A. A.; Verkhusha, V. V., A bacterial phytochrome-based optogenetic system controllable with near-infrared light. *Nat. Methods* **2016**, *13*, 591-597.
- (39) Bellini, D.; Papiz, M. Z., Structure of a bacteriophytochrome and light-stimulated protomer swapping with a gene repressor. *Structure* **2012**, *20*, 1436-1446.
- (40) Davis, S. J.; Vener, A. V.; Vierstra, R. D., Bacteriophytochromes: Phytochrome-like photoreceptors from nonphotosynthetic eubacteria. *Science* **1999**, *286*, 2517-2520.

- (41) Shu, X. K.; Royant, A.; Lin, M. Z.; Aguilera, T. A.; Lev-Ram, V.; Steinbach, P. A.; Tsien, R. Y., Mammalian expression of infrared fluorescent proteins engineered from a bacterial phytochrome. *Science* **2009**, *324*, 804-807.
- (42) Hughes, J.; Lamparter, T.; Mittmann, F.; Hartmann, E.; Gartner, W.; Wilde, A.; Borner, T., A prokaryotic phytochrome. *Nature* **1997**, *386*, 663-663.
- (43) Essen, L. O.; Mailliet, J.; Hughes, J., The structure of a complete phytochrome sensory module in the Pr ground state. *Proc. Natl. Acad. Sci. U. S. A.* **2008**, *105*, 14709-14714.
- (44) Levskaya, A.; Chevalier, A. A.; Tabor, J. J.; Simpson, Z. B.; Lavery, L. A.; Levy, M.; Davidson, E. A.; Scouras, A.; Ellington, A. D.; Marcotte, E. M.; Voigt, C. A., Engineering Escherichia coli to see light - These smart bacteria 'photograph' a light pattern as a high-definition chemical image. *Nature* **2005**, *438*, 441-442.
- (45) Sharrock, R. A.; Quail, P. H., Novel phytochrome sequences in Arabidopsis thaliana: structure, evolution, and differential expression of a plant regulatory photoreceptor family. *Genes Dev.* **1989**, *3*, 1745-1757.
- (46) Burgie, E. S.; Bussell, A. N.; Walker, J. M.; Dubiel, K.; Vierstra, R. D., Crystal structure of the photosensing module from a red/far-red light-absorbing plant phytochrome. *Proc. Natl. Acad. Sci. U. S. A.* **2014**, *111*, 10179-10184.
- (47) Shimizu-Sato, S.; Huq, E.; Tepperman, J. M.; Quail, P. H., A light-switchable gene promoter system. *Nat. Biotechnol.* **2002**, *20*, 1041-1044.
